# Supplementary material for: Secondary brown carbon formation via the dicarbonyl imine pathway: nitrogen heterocycle formation and synergistic effects
Source: Royal Society of Chemistry journal article supplement (doi:10.1039/c6cp03029g), 2016-01-01
Supplement: c6cp03029g1.pdf [file c6cp03029g1.pdf]

*SUPPORTING INFORMATION*

**Secondary brown carbon formation *via* the dicarbonyl imine pathway: nitrogen**

**heterocycle formation and synergistic effects**

Christopher J. Kampf<sup>1,2,\*</sup>, Alexander Filippi<sup>1,2</sup>, Christoph Zuth<sup>1</sup>, Thorsten Hoffmann<sup>1</sup>, Till Opatz<sup>3</sup>

<sup>1</sup>Johannes Gutenberg-Universität Mainz, Institut für Anorganische und Analytische Chemie,  
Duesbergweg 10-14, 55128 Mainz, Germany

<sup>2</sup>Max-Planck-Institut für Chemie, Abteilung für Multiphasenchemie, Hahn-Meitner-Weg 1,  
55128 Mainz, Germany

<sup>3</sup>Johannes Gutenberg-Universität Mainz, Institut für Organische Chemie, Duesbergweg 10-14,  
55128 Mainz, Germany

\* address correspondence to: Christopher J. Kampf, phone: +49 6131 39 25877, fax: +49 6131 39  
25336, Email: [kampfjc@uni-mainz.de](mailto:kampfjc@uni-mainz.de)

**Summary**

|                 |                                  |               |
|-----------------|----------------------------------|---------------|
| Table S1        |                                  | Page S2       |
| Figures S1-S7   | UV/Vis Spectrometry              | Pages S3-S6   |
| Figures S8-S15  | HPLC-DAD analysis                | Pages S7-S14  |
| Figures S16-S32 | UHPLC-HRMS <sup>2</sup> analysis | Pages S15-S21 |
| Figures S33-S36 | Reference compound analysis      | Pages S22-S25 |

**Table S1.** List of initial and final pH, as well as  $m/z$  values for targeted MS2 analyses of reaction systems studied in this work.

| Reaction system | initial pH | final pH | $m/z$ for targeted MS <sup>2</sup>                            |
|-----------------|------------|----------|---------------------------------------------------------------|
| Gly/AS          | 3.2-3.4    | 2.4-2.5  | 69.1, 115.1                                                   |
| MGly/AS         | 3.0-3.1    | 2.3      | 125.1, 126.1, 83.2, 251.1, 215.1                              |
| BD/AS           | 3.4-3.5    | 2.8      | 221.1, 195.1                                                  |
| AcAc/AS         | 4.0-4.2    | 3.7-3.9  |                                                               |
| HD/AS           | 3.9-4.2    | 3.6-3.7  | 201.2, 280.3, 265.3, 187.2, 217.2, 96.14                      |
| GA/AS           | 3.4-3.6    | 2.3-2.5  | 214.2, 296.3, 82.2, 314.3                                     |
| AcA+AcAc/AS     | 3.7-3.8    | 2.5-2.6  | 230.2, 209.2, 208.2, 164.2                                    |
| Gly+AcAc/AS     | 3.3        | 1.7      | 140.2, 164.2, 69.1                                            |
| Gly+MGly/AS     | 2.9        | 2.1      | 125.1, 168.1, 111.2, 115.2, 69.1, 257.1, 83.2, 234.2          |
| Gly+MGly+GA/AS  | 2.8        | 1.9      | 125.1, 115.2, 214.2, 296.3, 225.2, 235.2, 153.2, 207.2, 167.2 |
| Gly/glycine     | 3.9        | 3.4      | 185.1, 199.1, 143.1                                           |
| MGly/glycine    | 3.5        | 2.9      | 184.1, 156.1                                                  |
| BD/glycine      | 4.9        | 3.9      | 254.1, 238.1, 213.1                                           |
| HD/glycine      | 4.3        | 3.4      | 317.2, 381.3, 166.1, 454.3, 248.2, 307.3, 315.2, 344.3, 154.1 |
| GA/glycine      | 3.5        | 3.3      | 138.1, 238.2, 340.3, 220.2, 152.0                             |

## 1. UV/Vis Spectrometry

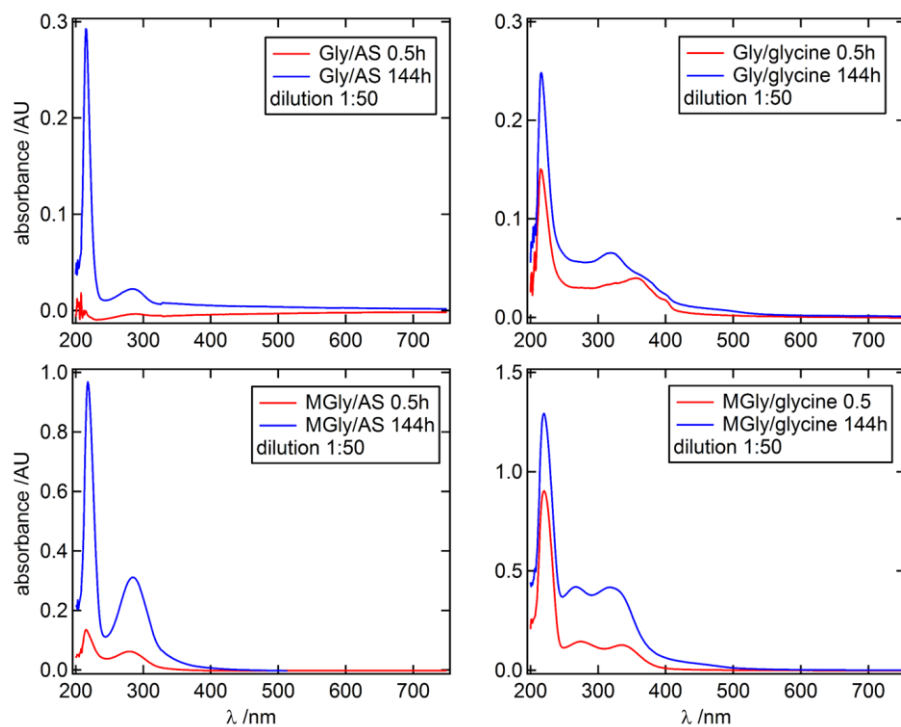

**Figure S1.** UV/Vis spectra of Gly/AS (top left), Gly/glycine (top right), MGly/AS (bottom left), and MGly/glycine (bottom right). Initial dicarbonyl concentrations were 1M, AS was 1M, and glycine was 0.5M.

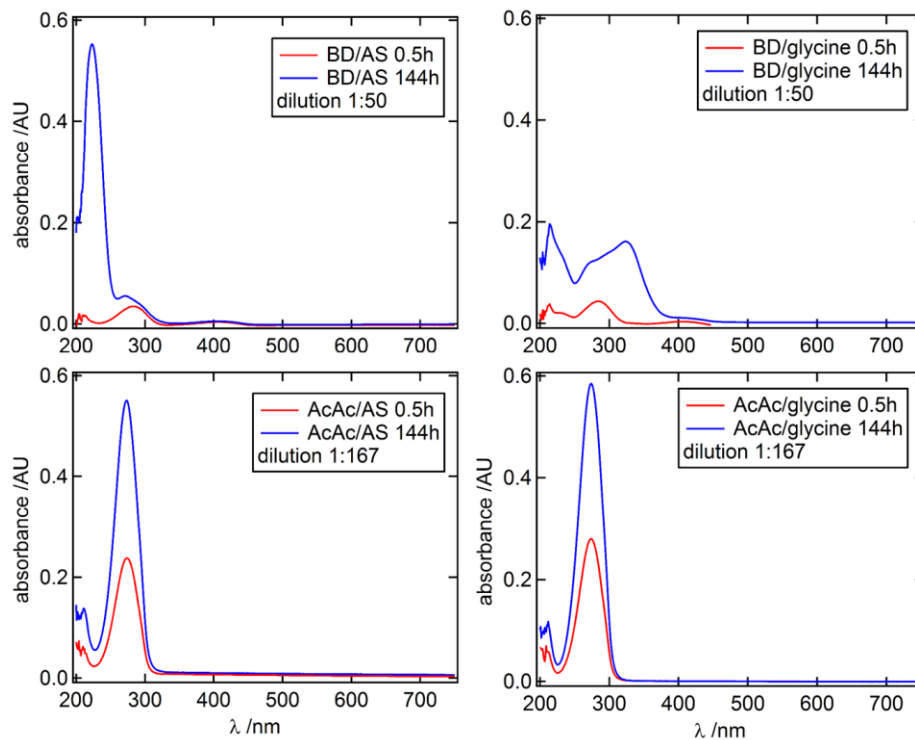

**Figure S2.** UV/Vis spectra of BD/AS (top left), BD/glycine (top right), AcAc/AS (bottom left), and AcAc/glycine (bottom right). Initial dicarbonyl concentrations were 1M, AS was 1M, and glycine was 0.5M.

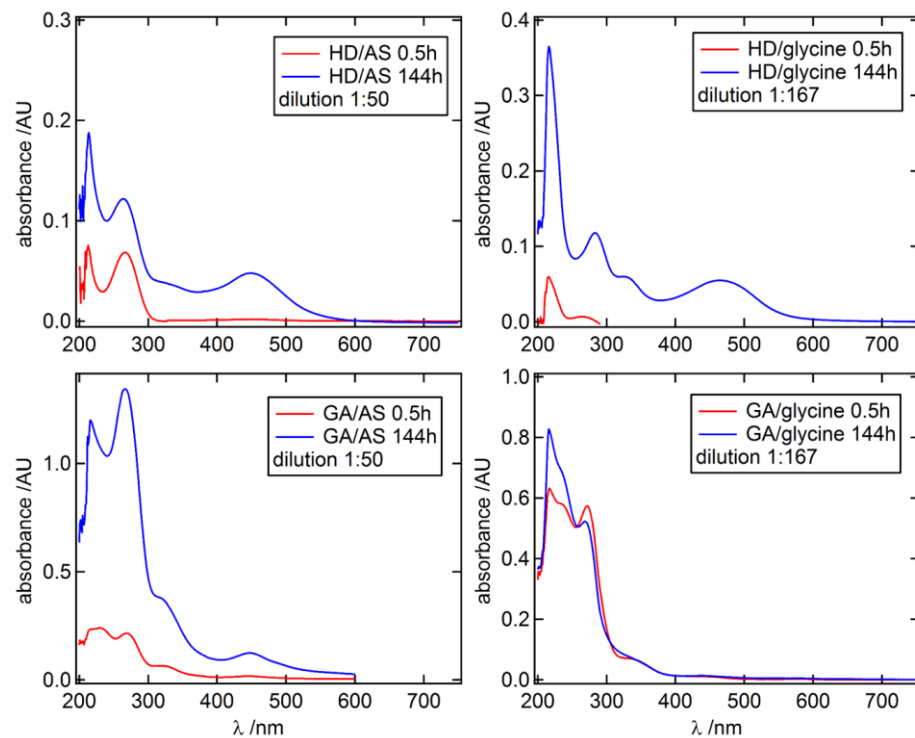

**Figure S3.** UV/Vis spectra of HD/AS (top left), HD/glycine (top right), GA/AS (bottom left), and GA/glycine (bottom right). Initial dicarbonyl concentrations were 1M, AS was 1M, and glycine was 0.5M.

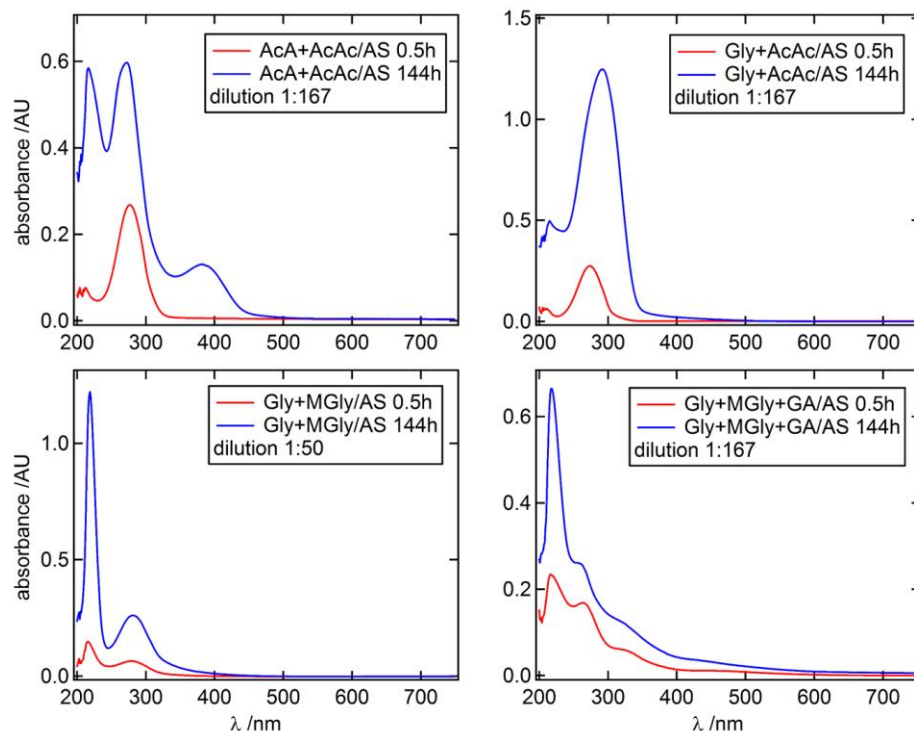

**Figure S4.** UV/Vis spectra of AcA+AcAc/AS (top left), Gly+AcAc/AS (top right), Gly+MGly/AS (bottom left), and Gly+MGly+GA/AS (bottom right). Initial dicarbonyl and AS concentrations were 1M.

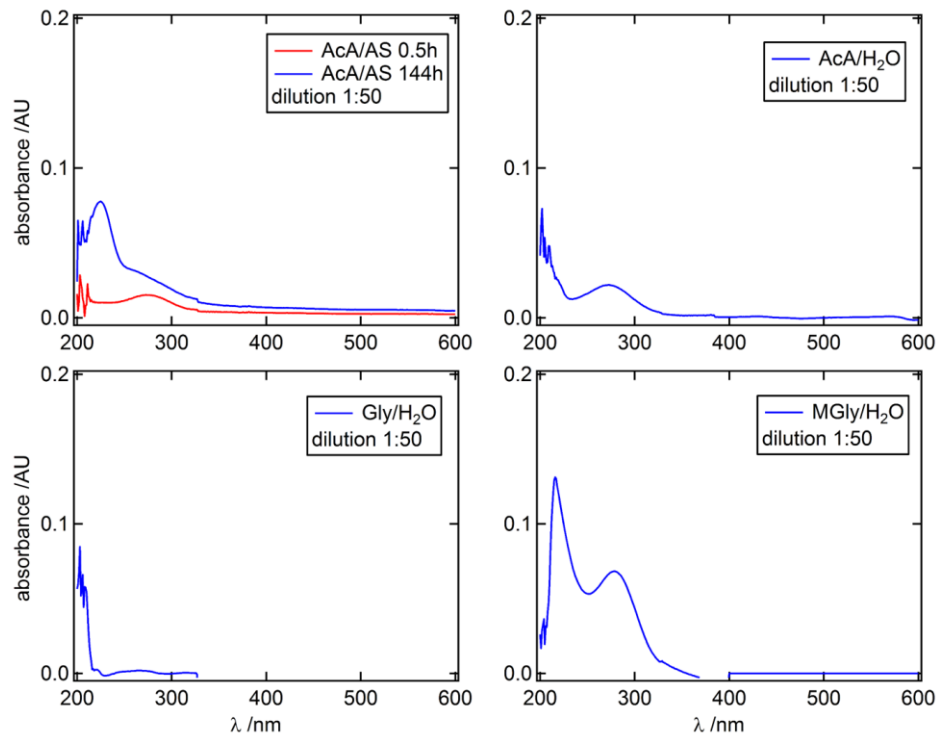

**Figure S5.** UV/Vis spectra of AcA/AS (top left), AcA/H<sub>2</sub>O (top right), Gly/H<sub>2</sub>O (bottom left), and MGly/H<sub>2</sub>O (bottom right). Initial dicarbonyl and AS concentrations were 1M.

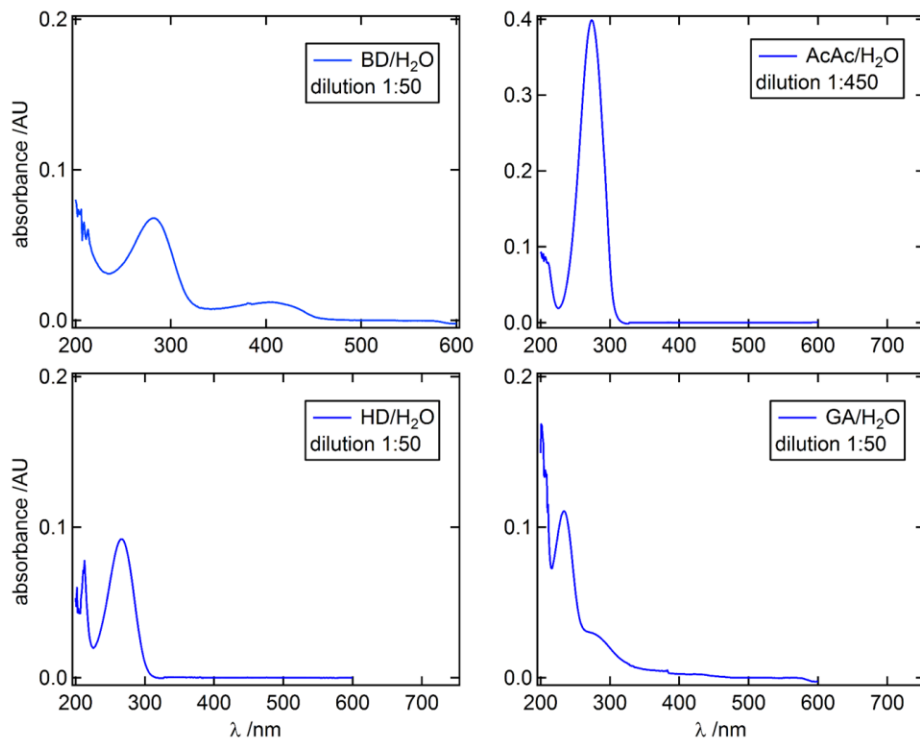

**Figure S6.** UV/Vis spectra of BD/H<sub>2</sub>O (top left), AcAc/H<sub>2</sub>O (top right), HD/H<sub>2</sub>O (bottom left), and GA/H<sub>2</sub>O (bottom right). Initial dicarbonyl concentrations were 1M.

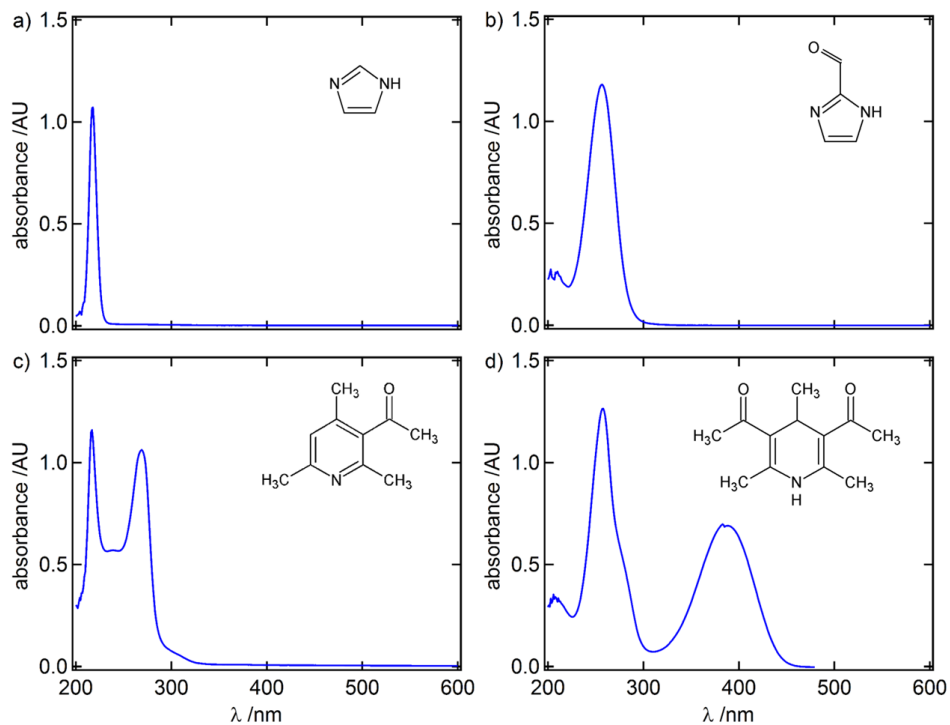

**Figure S7.** UV/Vis spectra of reference compounds in H<sub>2</sub>O: a) 1*H*-Imidazole (IM), b) 1*H*-Imidazole-2-carbaldehyde (IC), c) 3-Acetyl-2,4,6-trimethylpyridine, d) 3,5-Diacetyl-2,4,6-trimethyl-1,4-dihydropyridine.

## 2. HPLC-DAD analysis

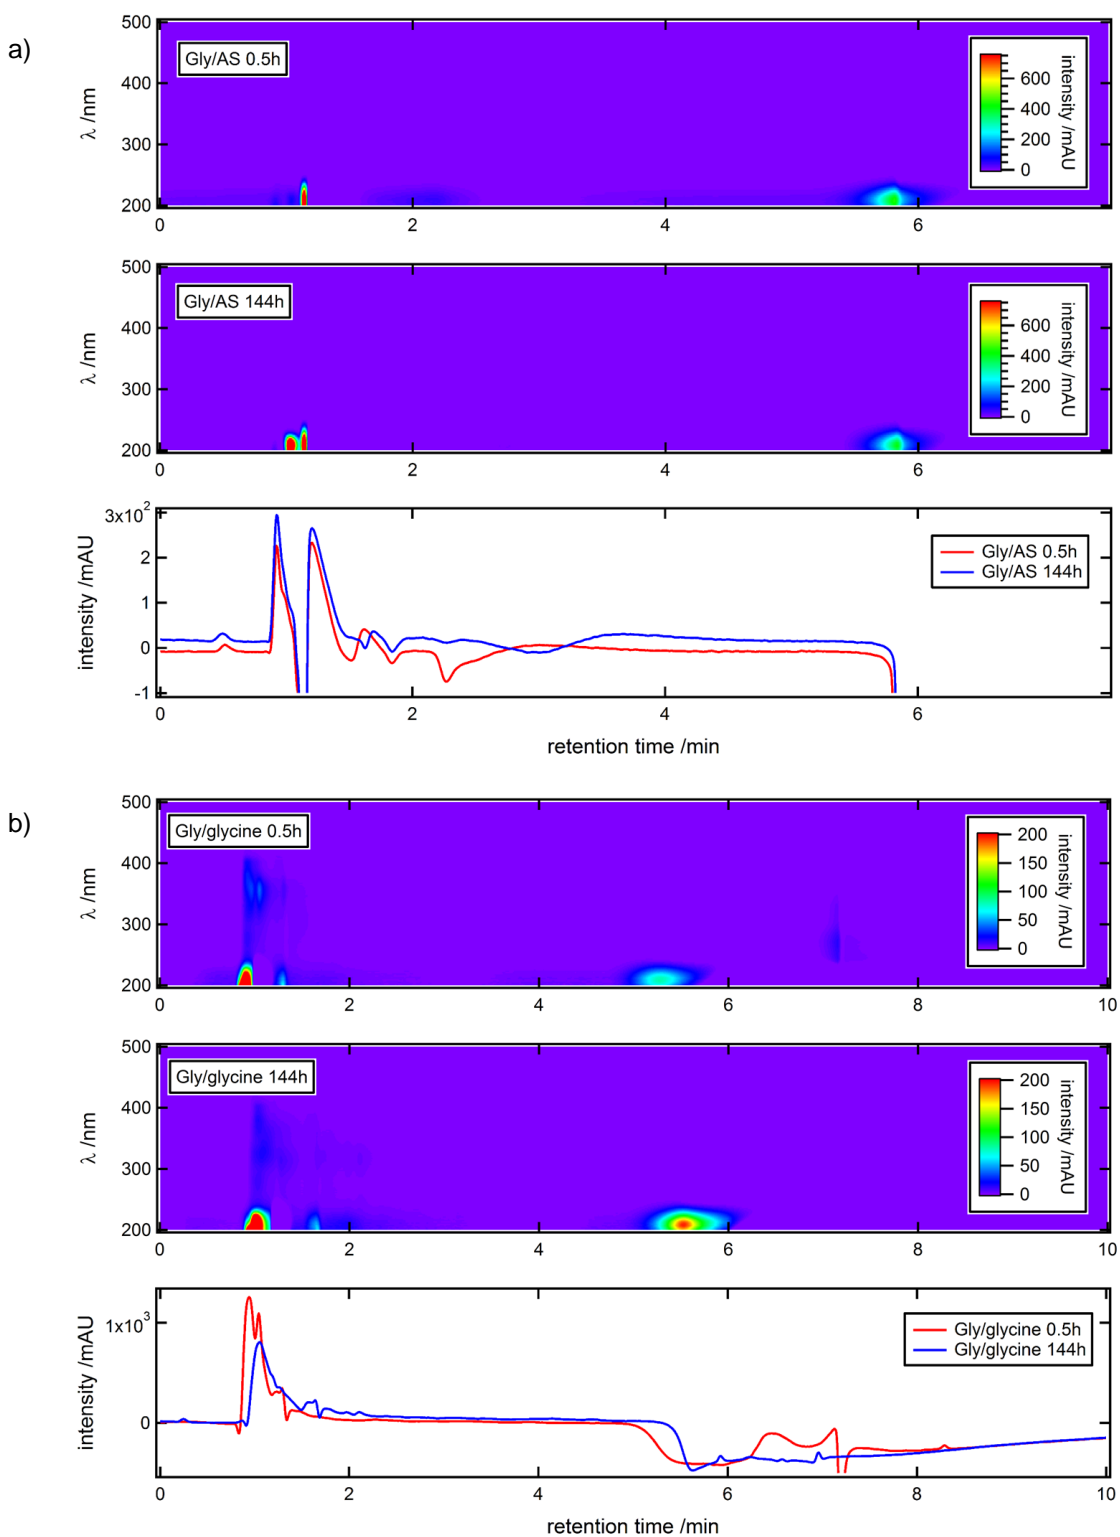

**Figure S8** a) HPLC-DAD image plot for Gly/AS: 0.5 (top) and 144 h (middle) reaction time; UV/Vis chromatogram (sum of  $\lambda = 300 - 500$  nm) for Gly/AS (bottom); b) HPLC-DAD image plot for Gly/glycine: 0.5 (top) and 144 h (middle) reaction time; UV/Vis chromatogram (sum of  $\lambda = 300 - 500$  nm) for Gly/glycine (bottom).

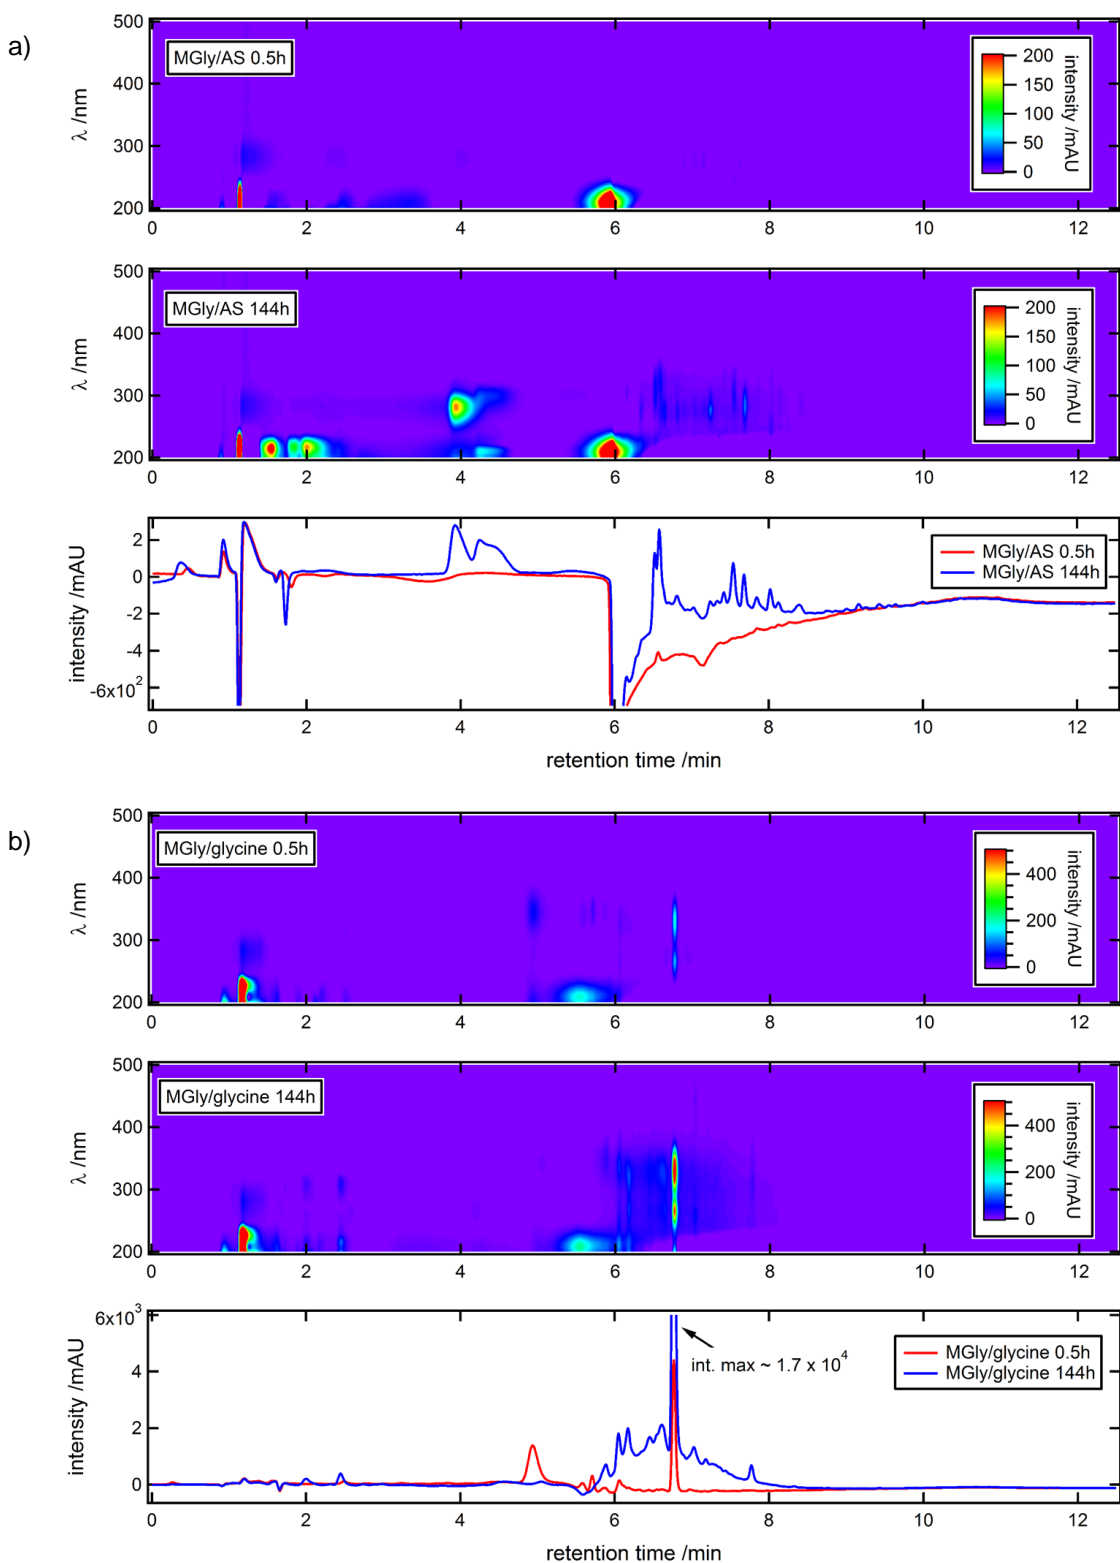

**Figure S9** a) HPLC-DAD image plot for MGly/AS: 0.5 (top) and 144 h (middle) reaction time; UV/Vis chromatogram (sum of  $\lambda = 300 - 500$  nm) for MGly/AS (bottom); b) HPLC-DAD image plot for MGly/glycine: 0.5 (top) and 144 h (middle) reaction time; UV/Vis chromatogram (sum of  $\lambda = 300 - 500$  nm) for MGly/glycine (bottom).



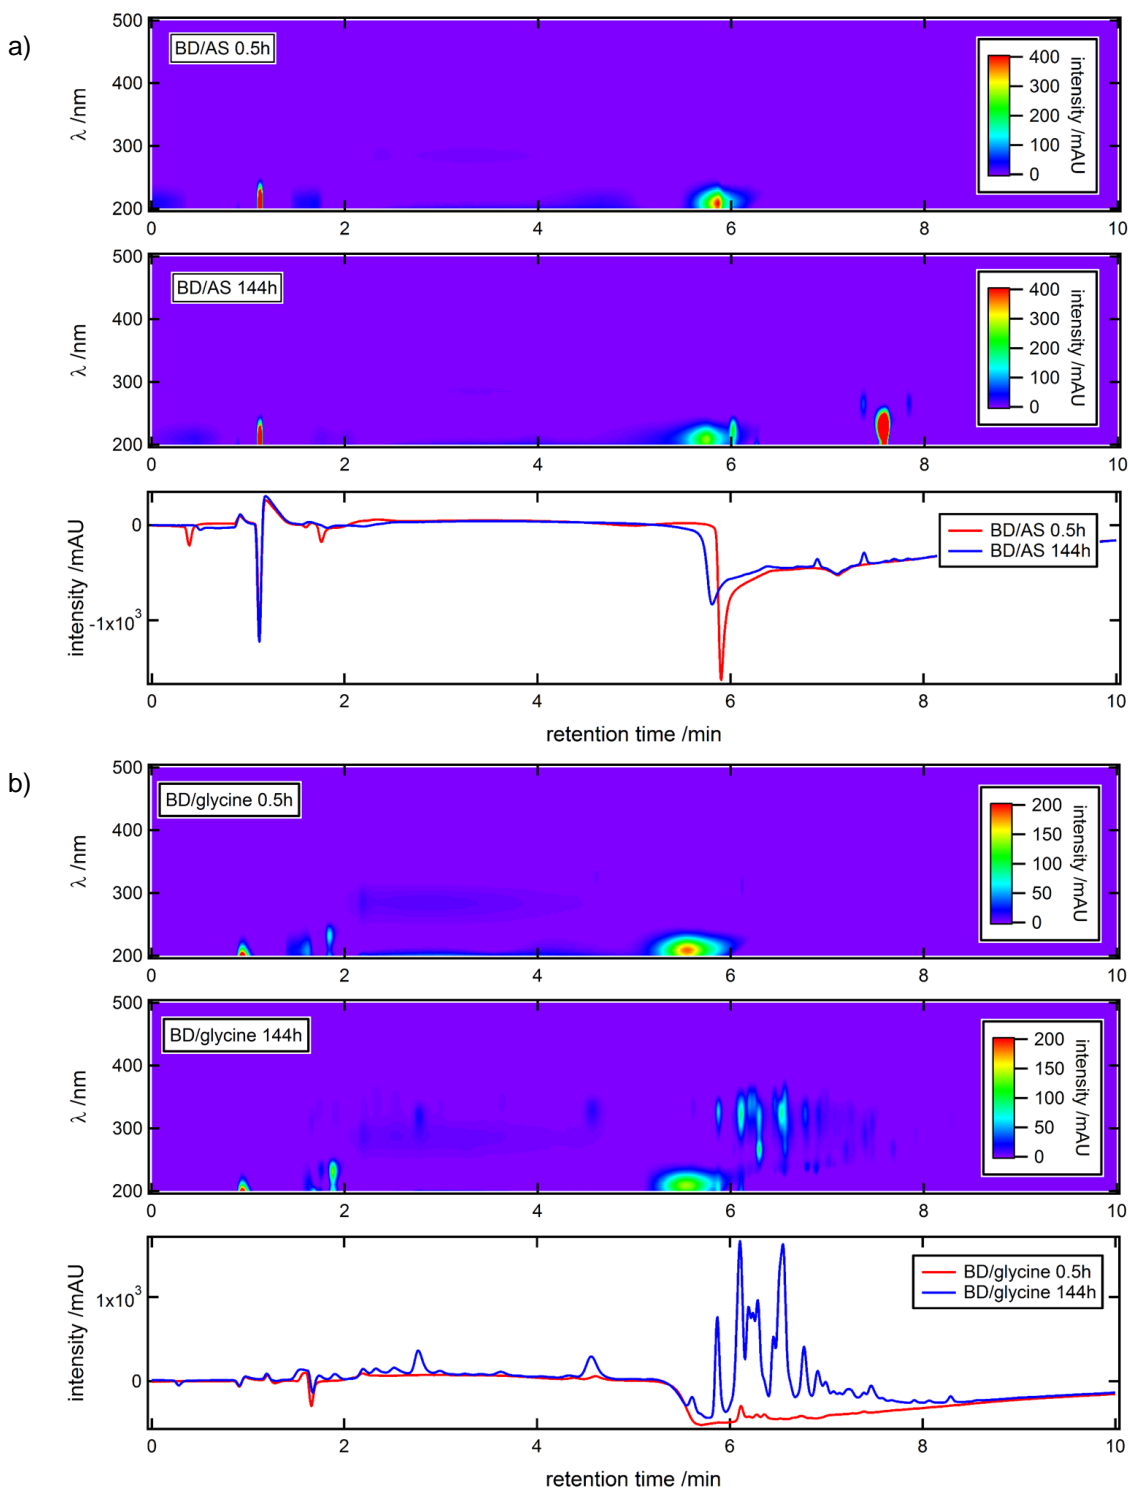

**Figure S10** a) HPLC-DAD image plot for BD/AS: 0.5 (top) and 144 h (middle) reaction time; UV/Vis chromatogram (sum of  $\lambda = 300 - 500$  nm) for BD/AS (bottom); b) HPLC-DAD image plot for BD/glycine: 0.5 (top) and 144 h (middle) reaction time; UV/Vis chromatogram (sum of  $\lambda = 300 - 500$  nm) for BD/glycine (bottom).

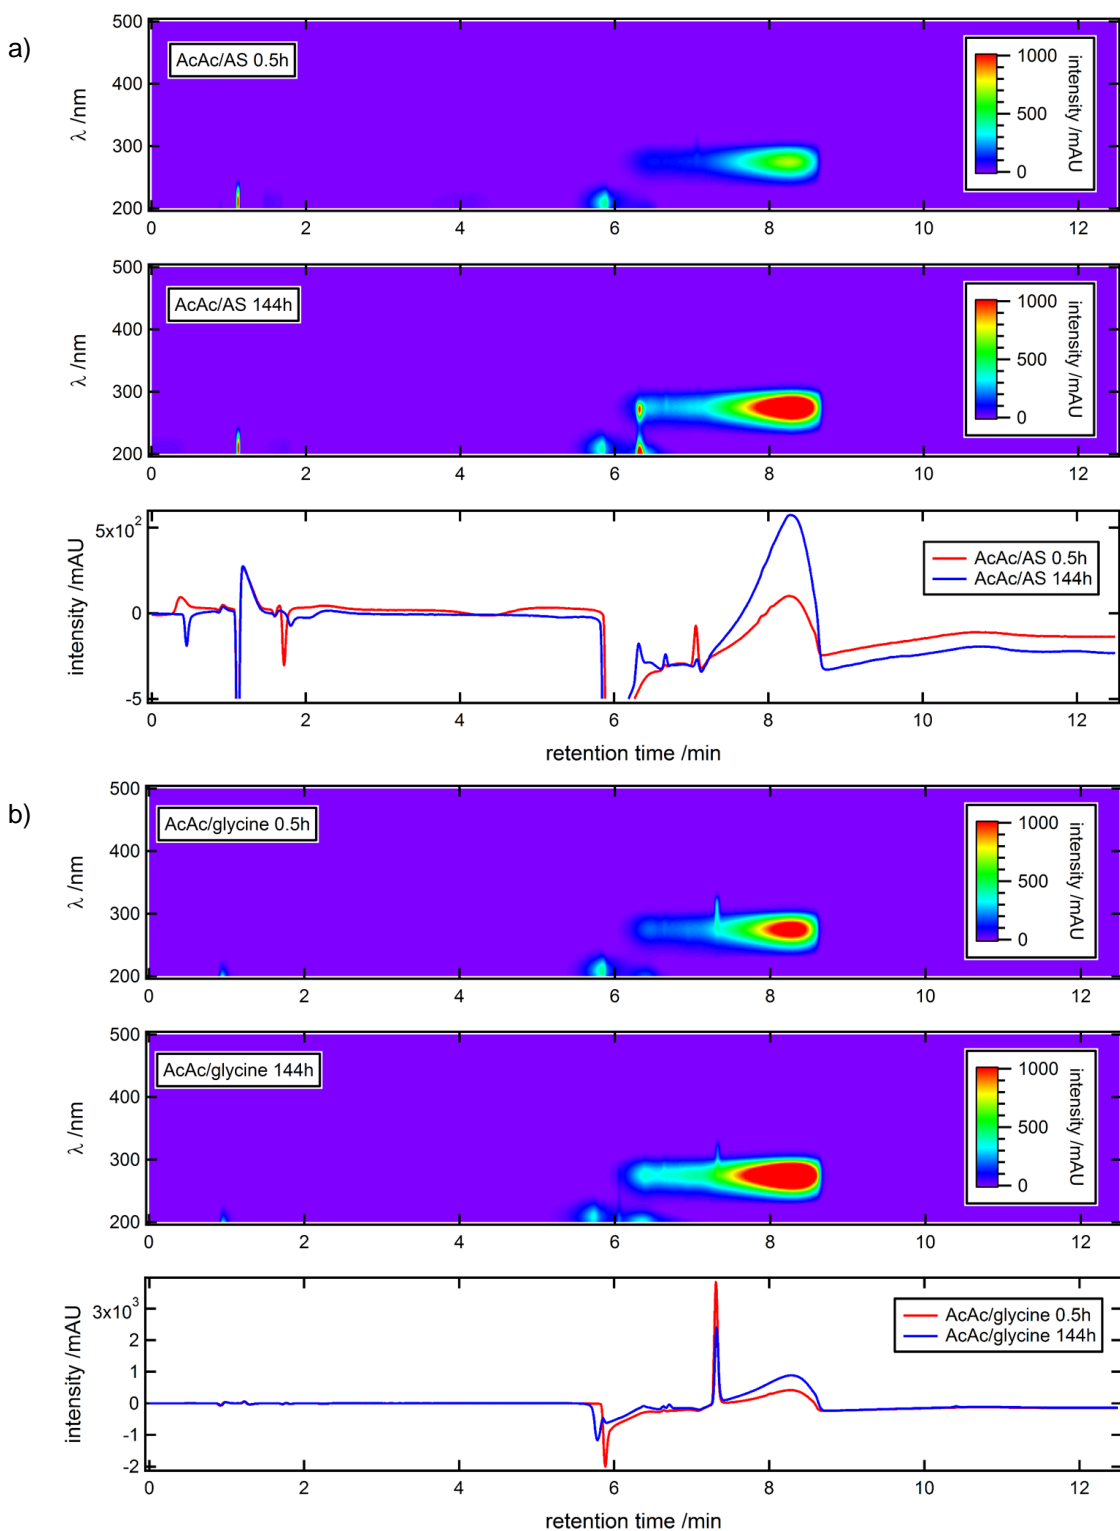

**Figure S11** a) HPLC-DAD image plot for AcAc/AS: 0.5 (top) and 144 h (middle) reaction time; UV/Vis chromatogram (sum of  $\lambda = 300 - 500$  nm) for AcAc/AS (bottom); b) HPLC-DAD image plot for AcAc/glycine: 0.5 (top) and 144 h (middle) reaction time; UV/Vis chromatogram (sum of  $\lambda = 300 - 500$  nm) for AcAc/glycine (bottom).

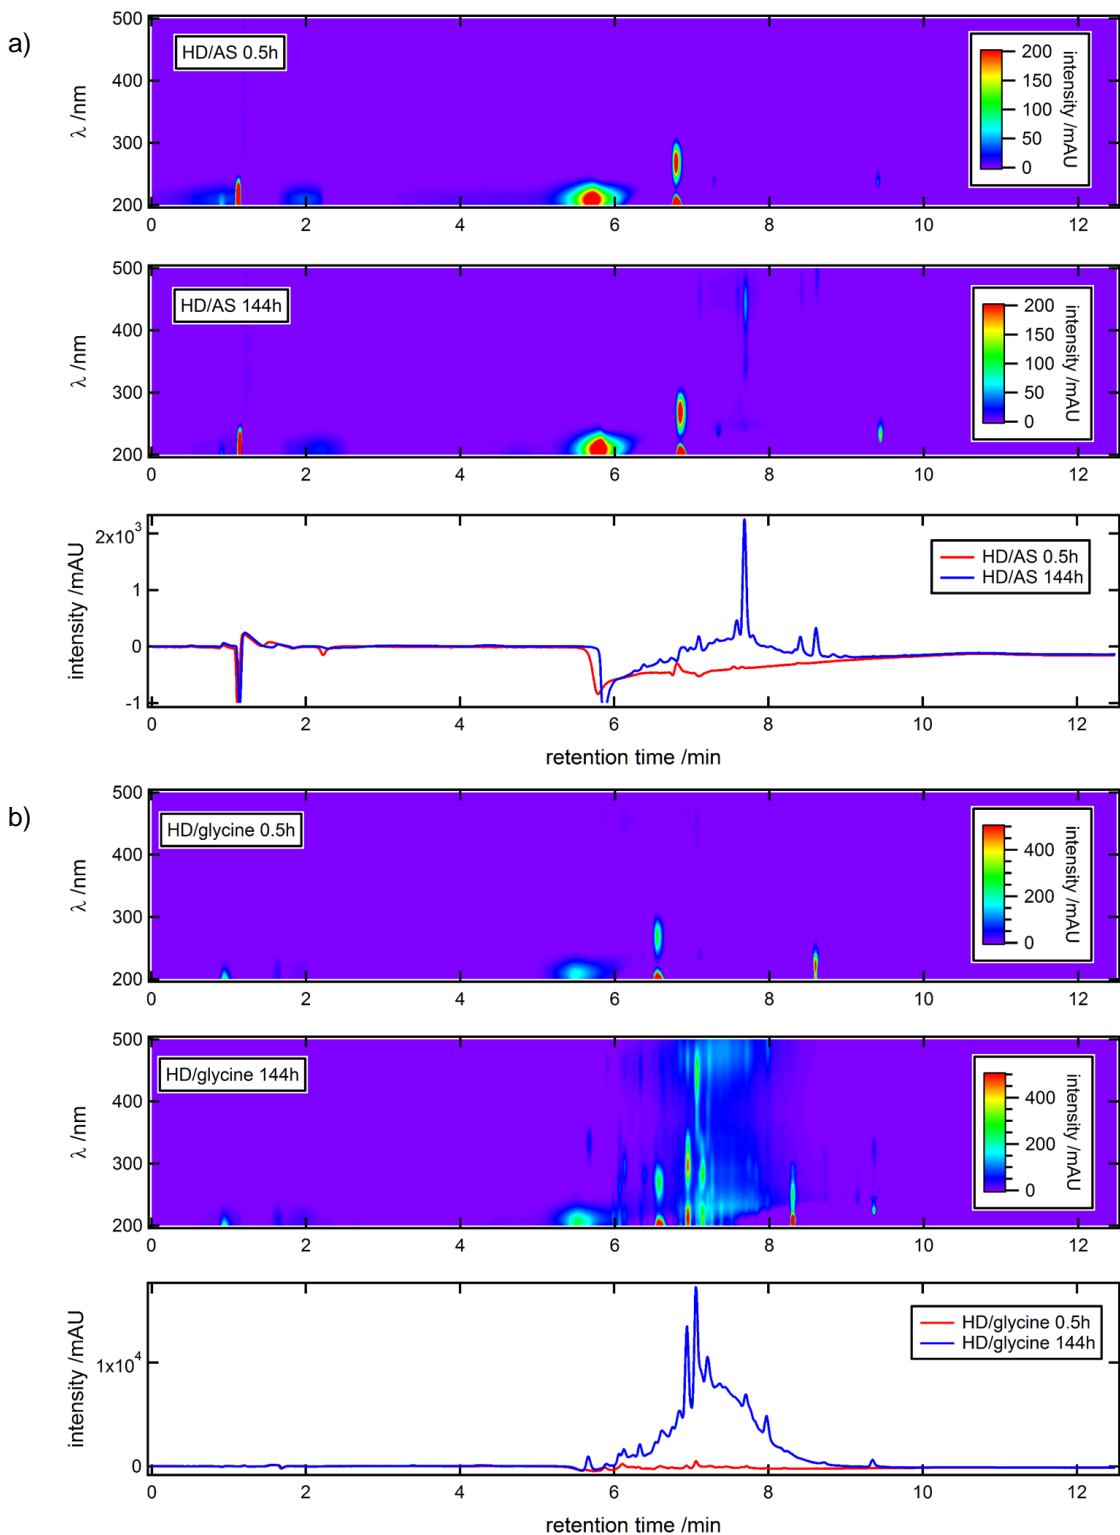

**Figure S12** a) HPLC-DAD image plot for HD/AS: 0.5 (top) and 144 h (middle) reaction time; UV/Vis chromatogram (sum of  $\lambda = 300 - 500$  nm) for HD/AS (bottom); b) HPLC-DAD image plot for HD/glycine: 0.5 (top) and 144 h (middle) reaction time; UV/Vis chromatogram (sum of  $\lambda = 300 - 500$  nm) for HD/glycine (bottom).

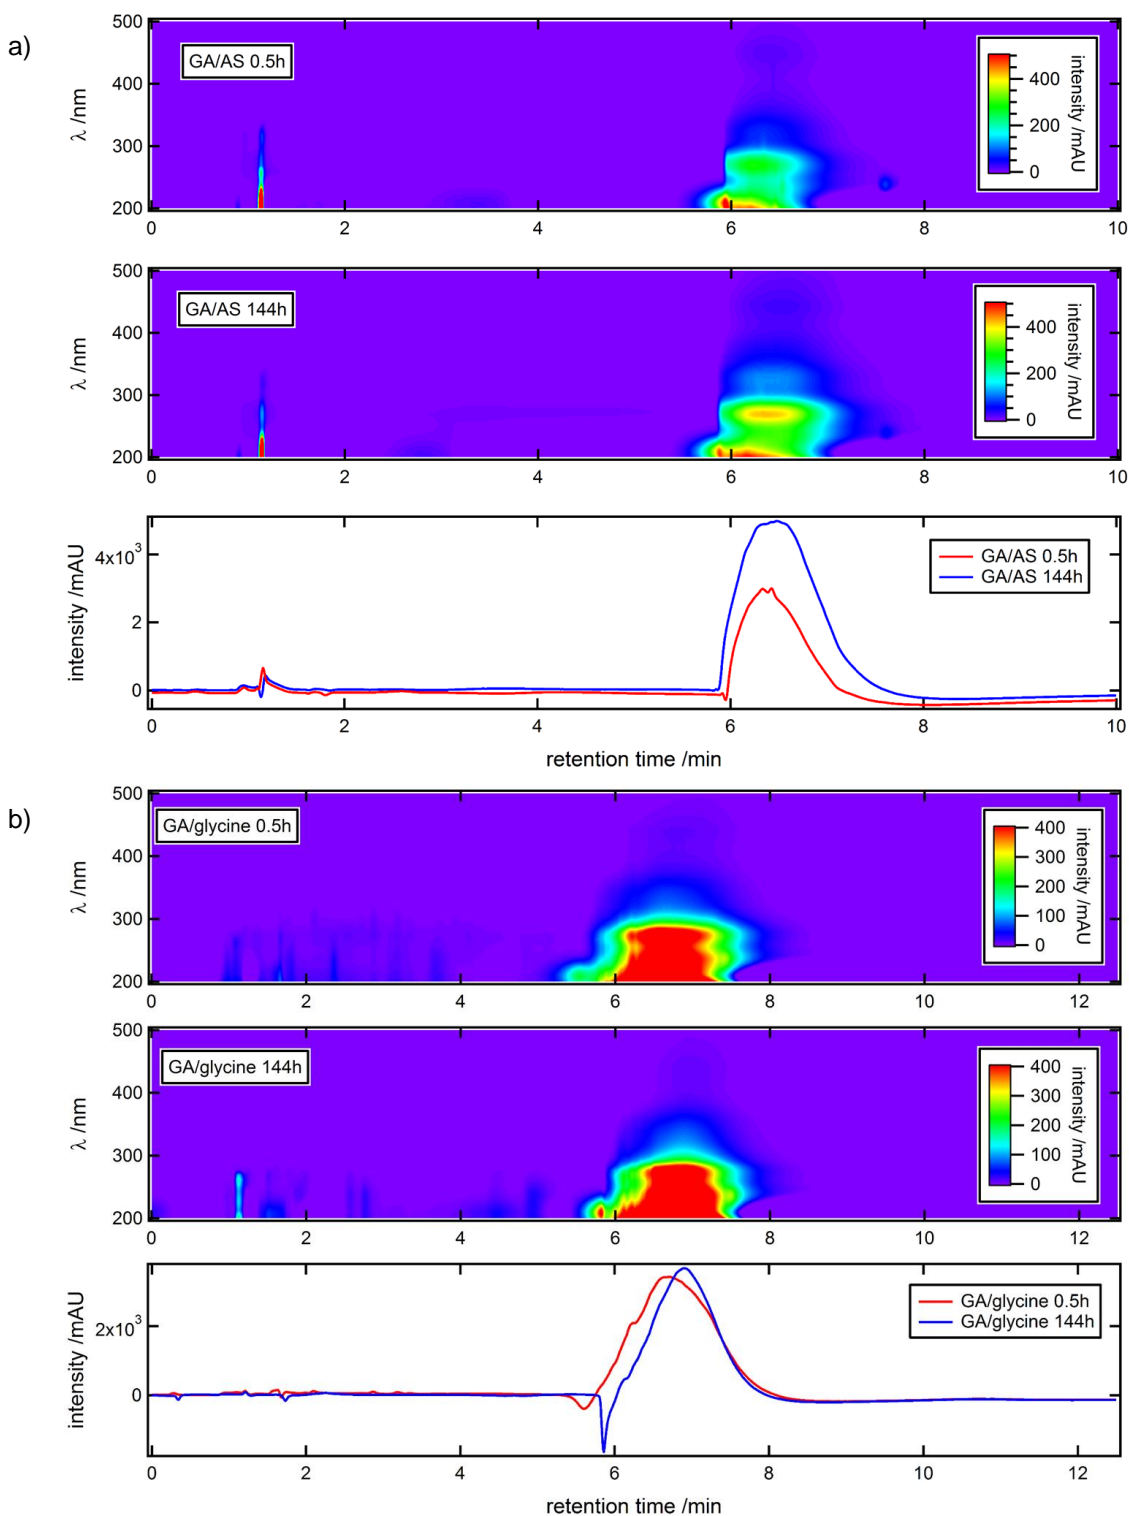

**Figure S13** a) HPLC-DAD image plot for GA/AS: 0.5 (top) and 144 h (middle) reaction time; UV/Vis chromatogram (sum of  $\lambda = 300 - 500$  nm) for GA/AS (bottom); b) HPLC-DAD image plot for GA/glycine: 0.5 (top) and 144 h (middle) reaction time; UV/Vis chromatogram (sum of  $\lambda = 300 - 500$  nm) for GA/glycine (bottom).

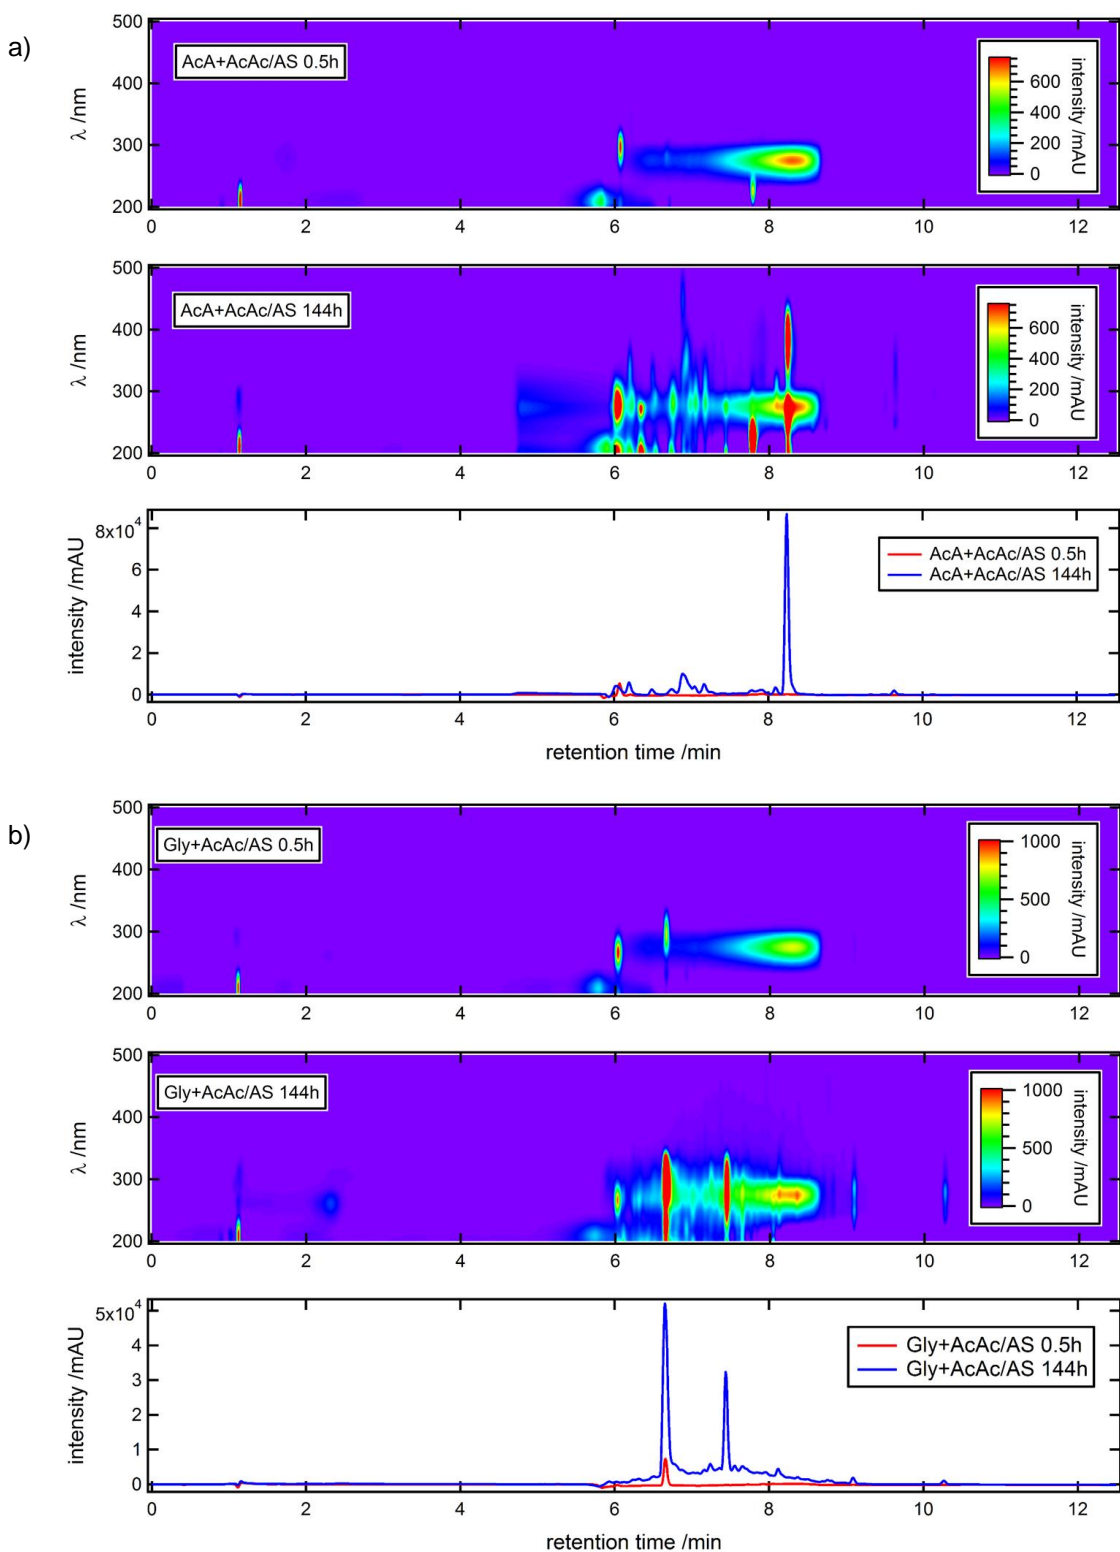

**Figure S14** a) HPLC-DAD image plot for AcA+AcAc/AS: 0.5 (top) and 144 h (middle) reaction time; UV/Vis chromatogram (sum of  $\lambda = 300 - 500$  nm) for AcA+AcAc/AS (bottom); b) HPLC-DAD image plot for Gly+AcAc/AS: 0.5 (top) and 144 h (middle) reaction time; UV/Vis chromatogram (sum of  $\lambda = 300 - 500$  nm) for Gly+AcAc/AS (bottom).

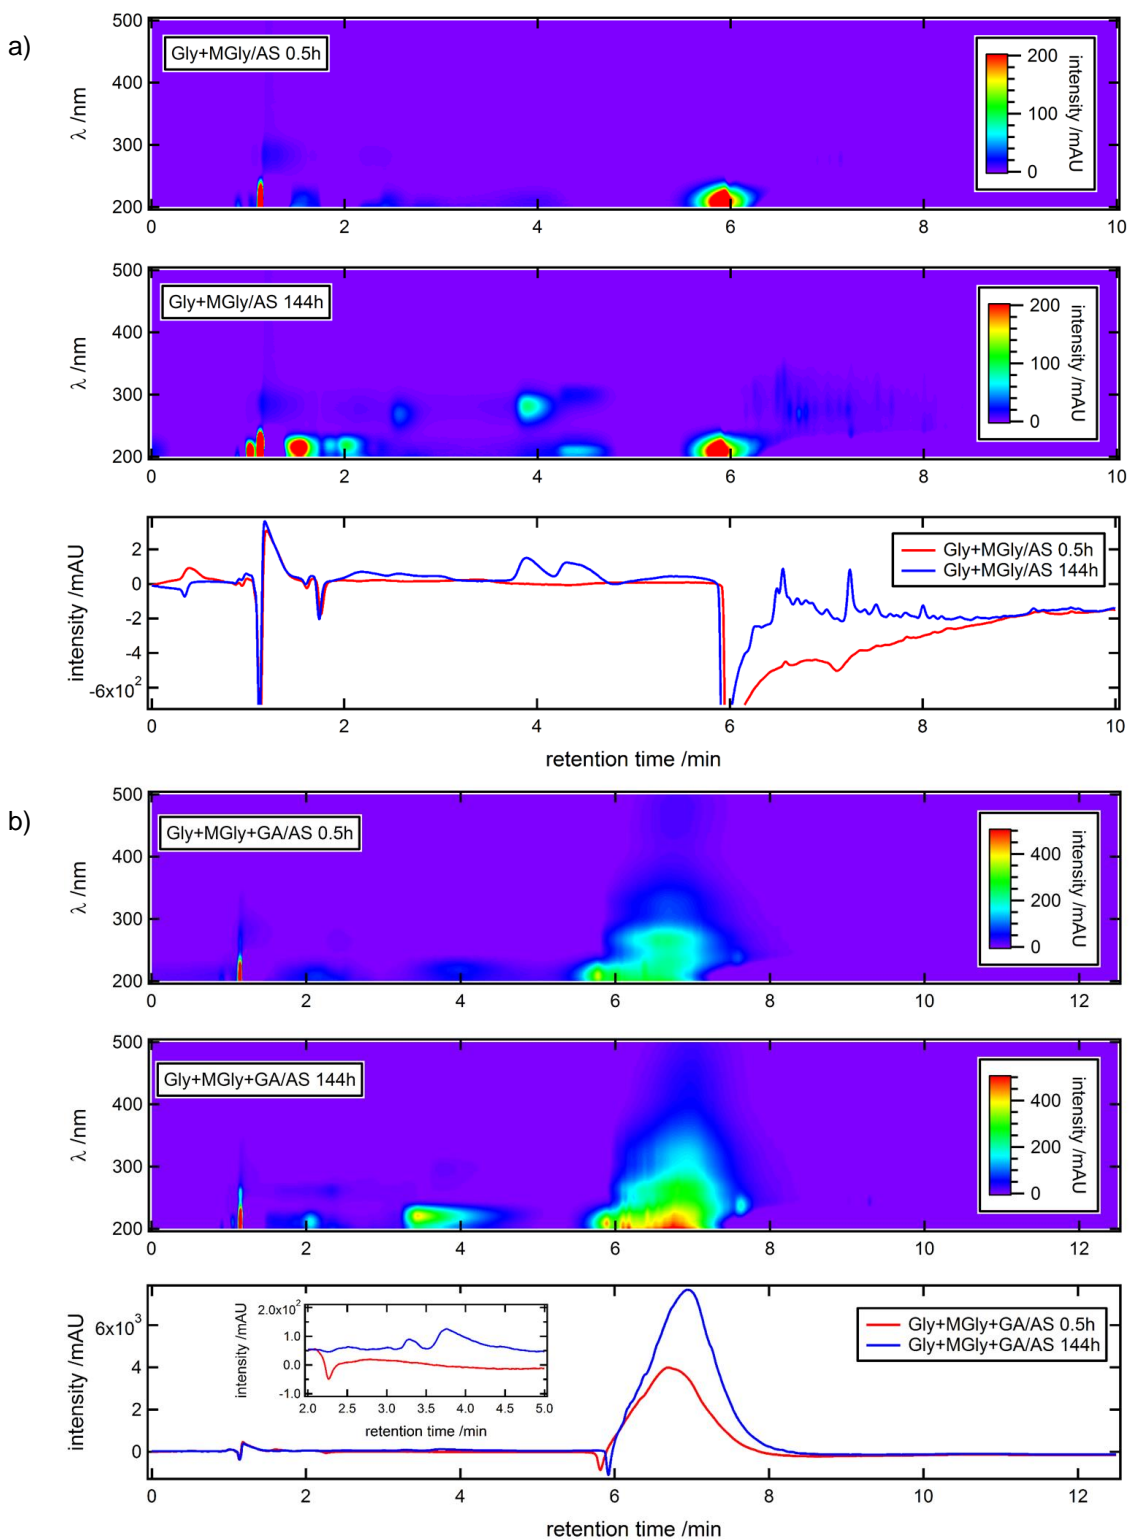

**Figure S15** a) HPLC-DAD image plot for Gly+MGly/AS: 0.5 (top) and 144 h (middle) reaction time; UV/Vis chromatogram (sum of  $\lambda = 300 - 500$  nm) for Gly+MGly/AS (bottom); b) HPLC-DAD image plot for Gly+MGly+GA/AS: 0.5 (top) and 144 h (middle) reaction time; UV/Vis chromatogram (sum of  $\lambda = 300 - 500$  nm) for Gly+MGly+GA/AS (bottom).

### 3. UHPLC-HESI-HRMS<sup>2</sup> analysis

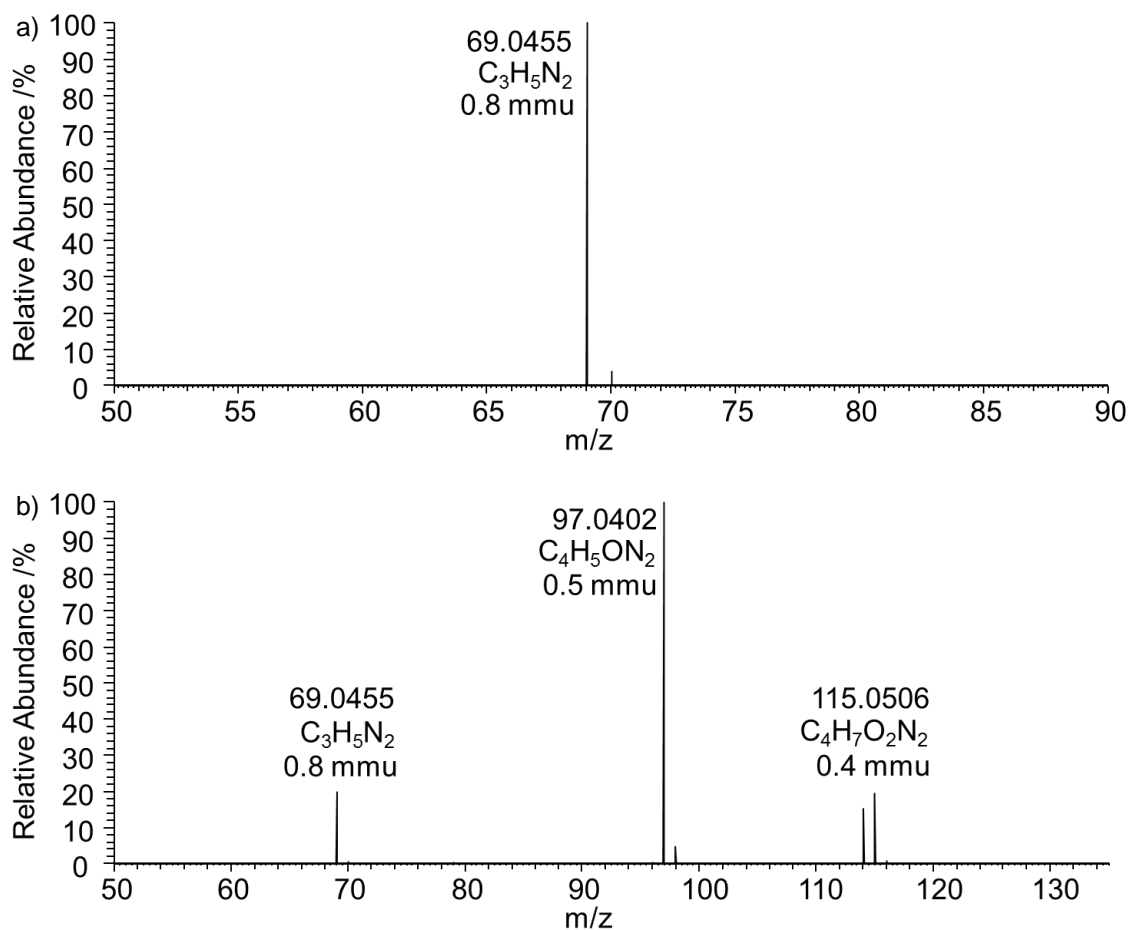

**Figure S16** MS<sup>2</sup> spectra of products observed in Gly/AS: a)  $m/z$  69.05 (HPLC RT = 1.2 min, UHPLC RT = 0.32 min), b)  $m/z$  115.05 (HPLC RT = 1.1 min, UHPLC RT = 0.33 min). Spectra were acquired using a fragmentation energy of 70 NCE (instrument specific parameter).

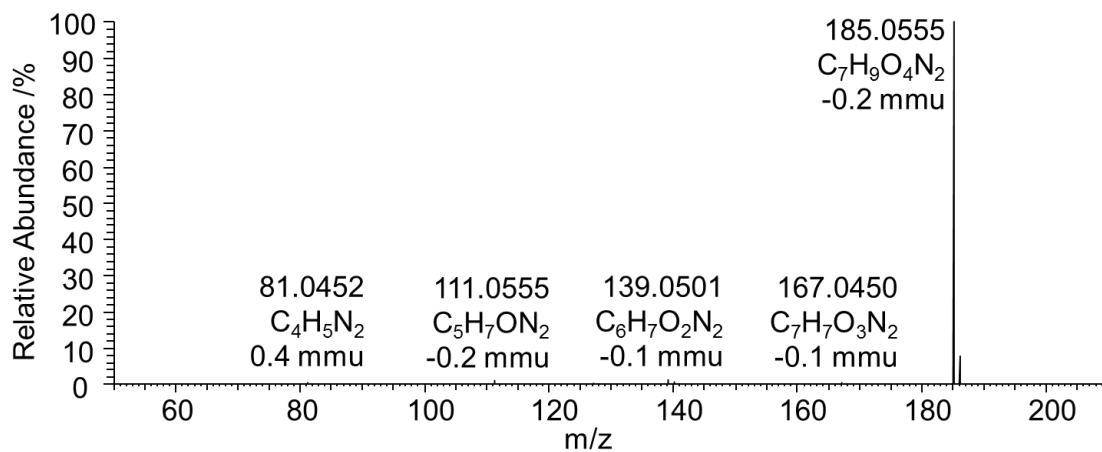

**Figure S17** MS<sup>2</sup> spectrum of product observed in Gly/glycine:  $m/z$  185.06 (HPLC RT = 1.1 min, UHPLC RT = 0.34 min). Spectra were acquired using a fragmentation energy of 70 NCE (instrument specific parameter).

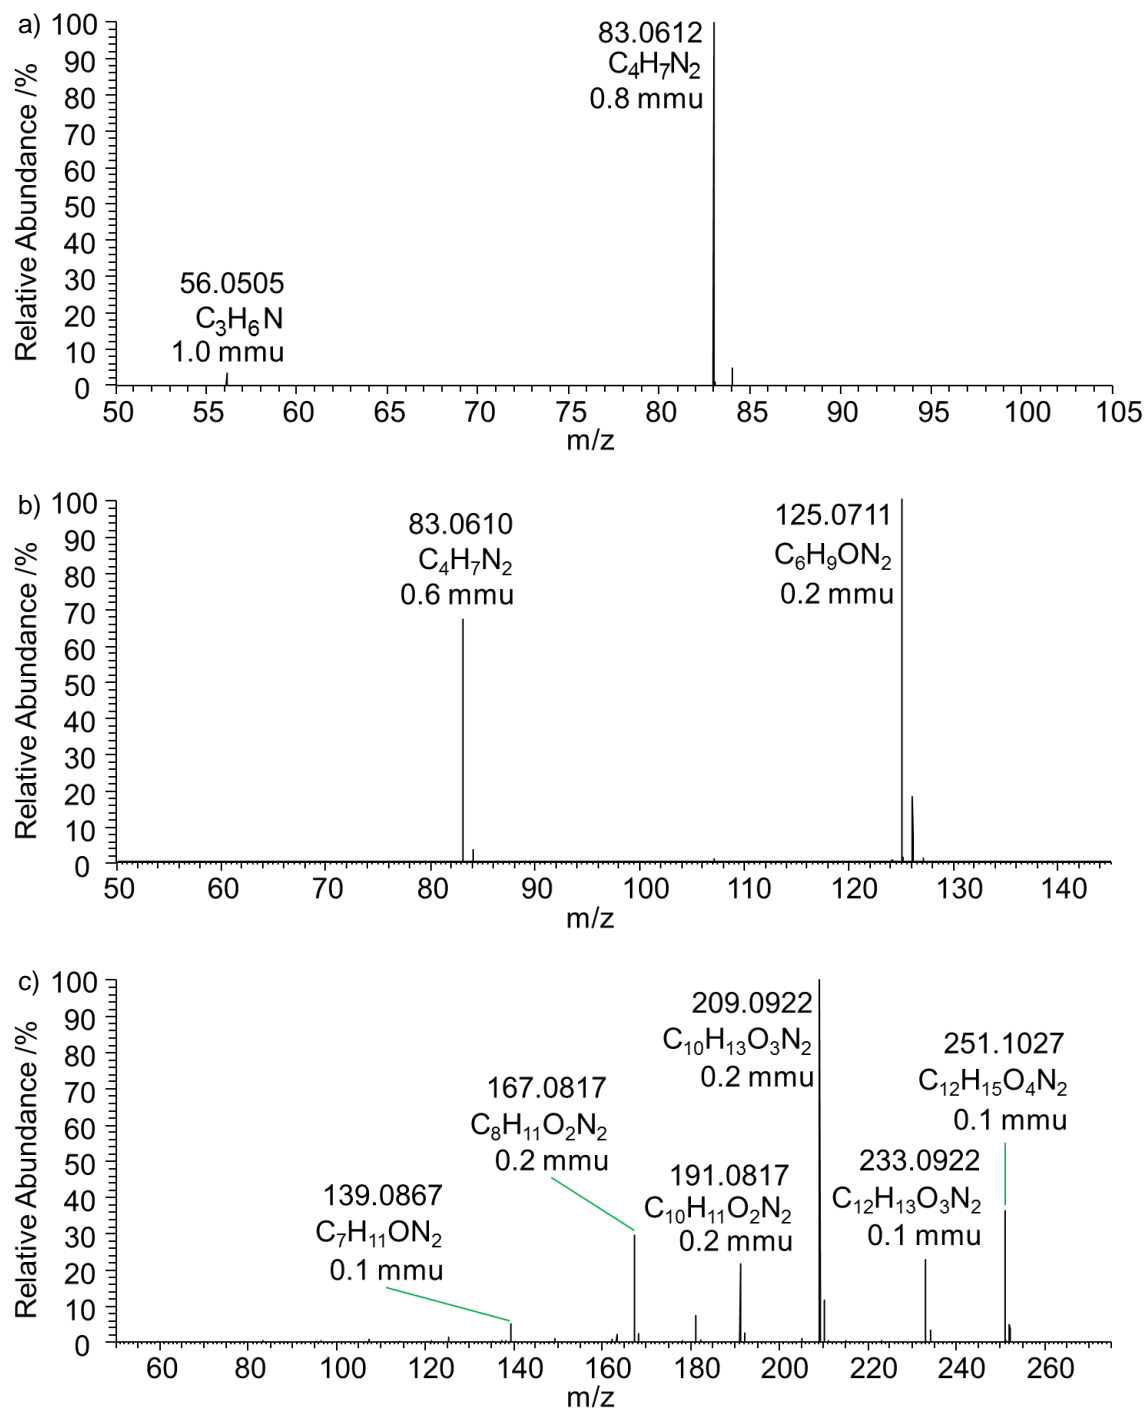

**Figure S18** MS<sup>2</sup> spectra of products observed in MGly/AS: a)  $m/z$  83.06 (HPLC RT = 1.2 min, UHPLC RT = 0.35 min) acquired using 70 NCE fragmentation energy (instrument specific parameter), b)  $m/z$  125.07 (HPLC RT = 3.9 min, UHPLC RT = 0.64 min), c)  $m/z$  251.10 (HPLC RT = 7.7 min, UHPLC RT = 1.75 min).



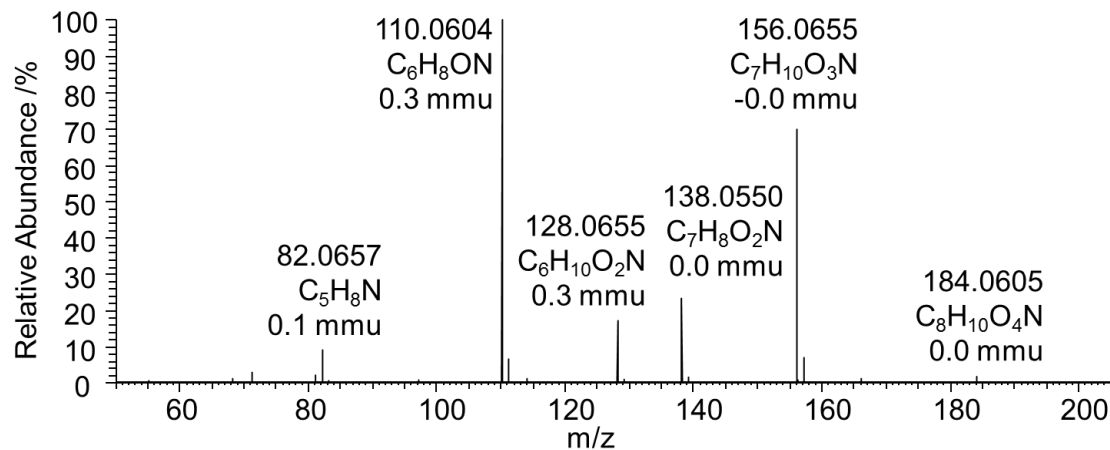

**Figure S19** MS<sup>2</sup> spectrum of product observed in MGly/glycine:  $m/z$  184.06 (HPLC RT = 6.8 min, UHPLC RT = 1.56 min).

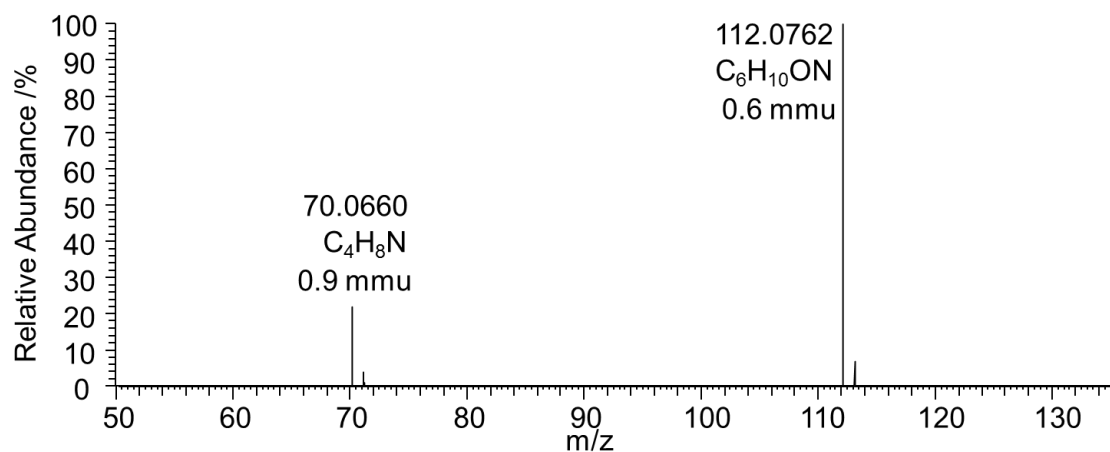

**Figure S20** MS<sup>2</sup> spectrum of product observed in BD/AS:  $m/z$  112.08 (HPLC RT = 7.8 min, UHPLC RT = 1.8 min).

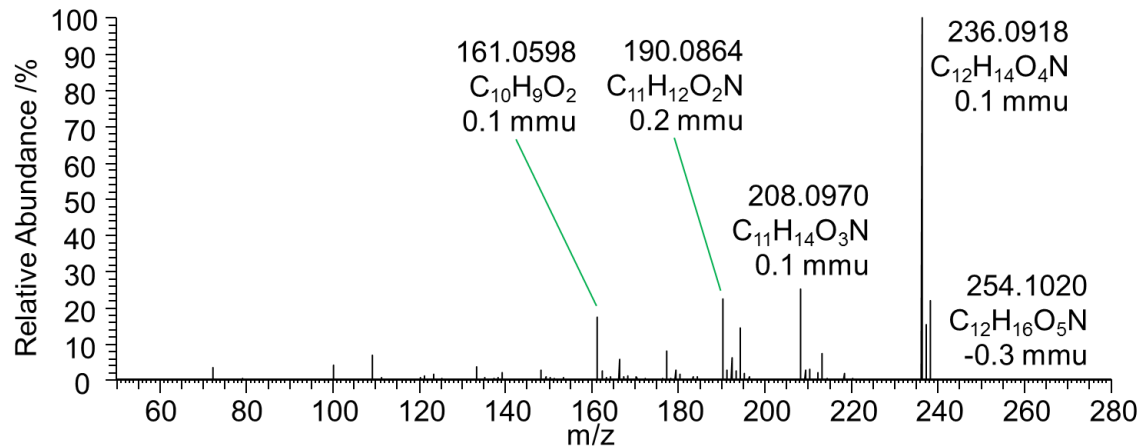

**Figure S21** MS<sup>2</sup> spectrum of product observed in BD/glycine:  $m/z$  254.10 (HPLC RT = 6.8 min, UHPLC RT = 1.48 min).

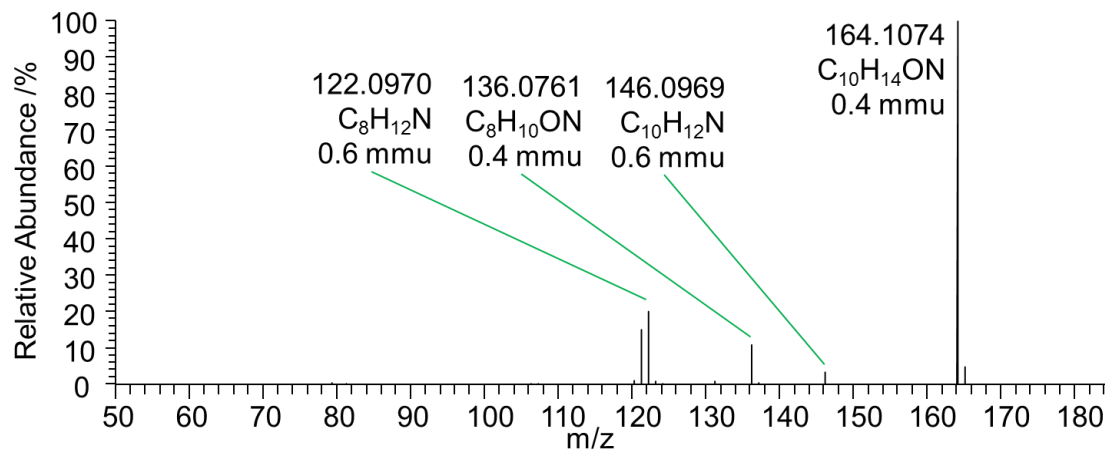

**Figure S22** MS<sup>2</sup> spectrum of product observed in AcAc/AS:  $m/z$  164.10 (HPLC RT = 6.3 min, UHPLC RT = 0.64 min). Spectra were acquired using a fragmentation energy of 70 NCE (instrument specific parameter).

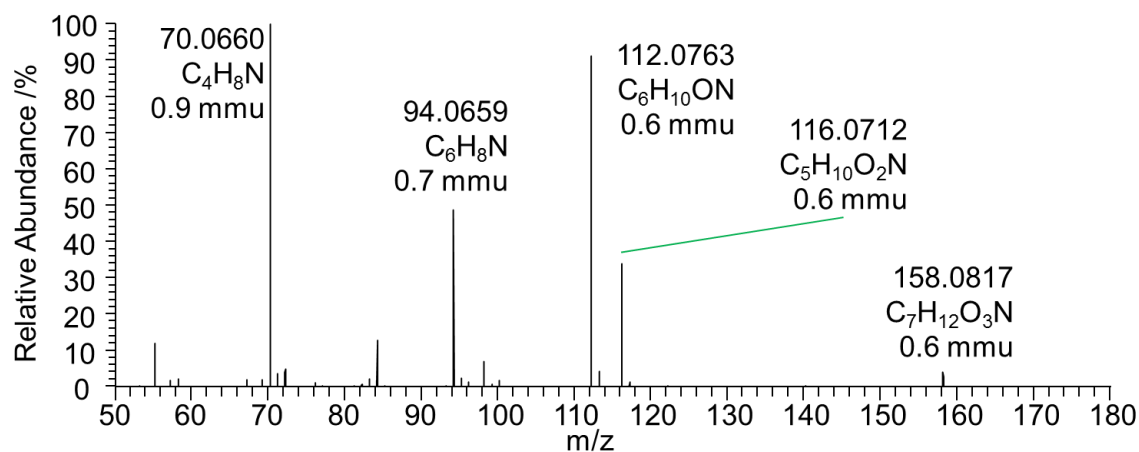

**Figure S23** MS<sup>2</sup> spectrum of product observed in AcAc/glycine:  $m/z$  158.0817 (HPLC RT = 7.3 min, UHPLC RT = 1.34 min). Spectra were acquired using a fragmentation energy of 70 NCE (instrument specific parameter).

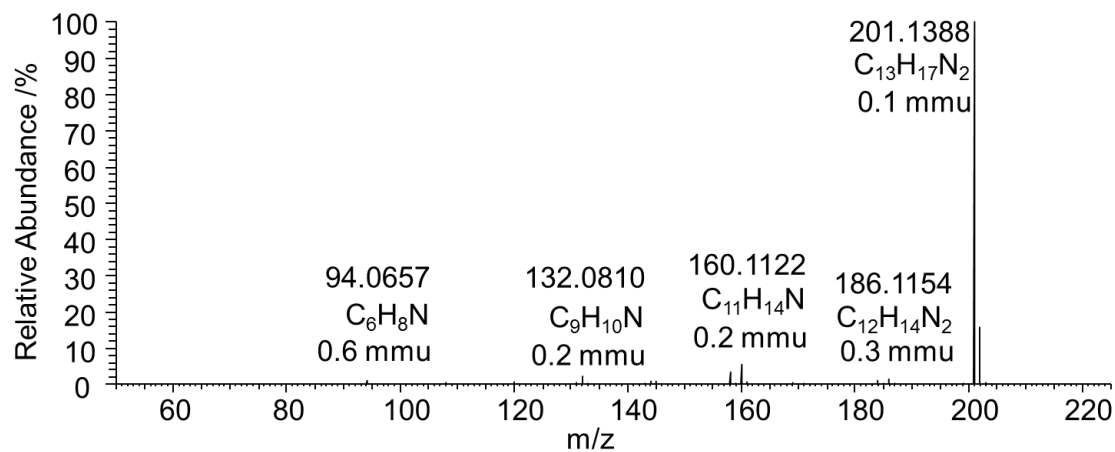

**Figure S24** MS<sup>2</sup> spectrum of product observed in HD/AS:  $m/z$  201.14 (HPLC RT = 7.7 min, UHPLC RT = 1.83 min).

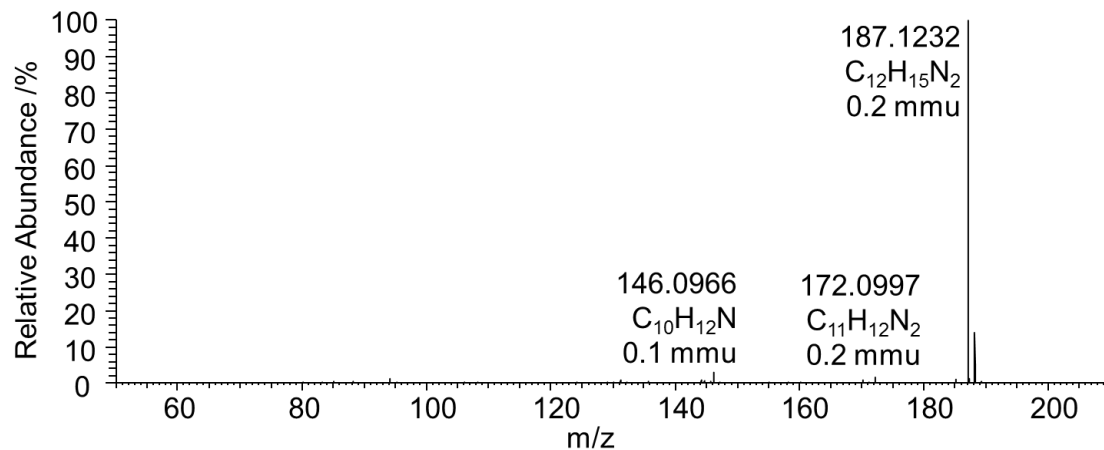

**Figure S25** MS<sup>2</sup> spectra of products observed in HD/AS:  $m/z$  187.12 (HPLC RT = 7.6 min, UHPLC RT = 1.76 min)

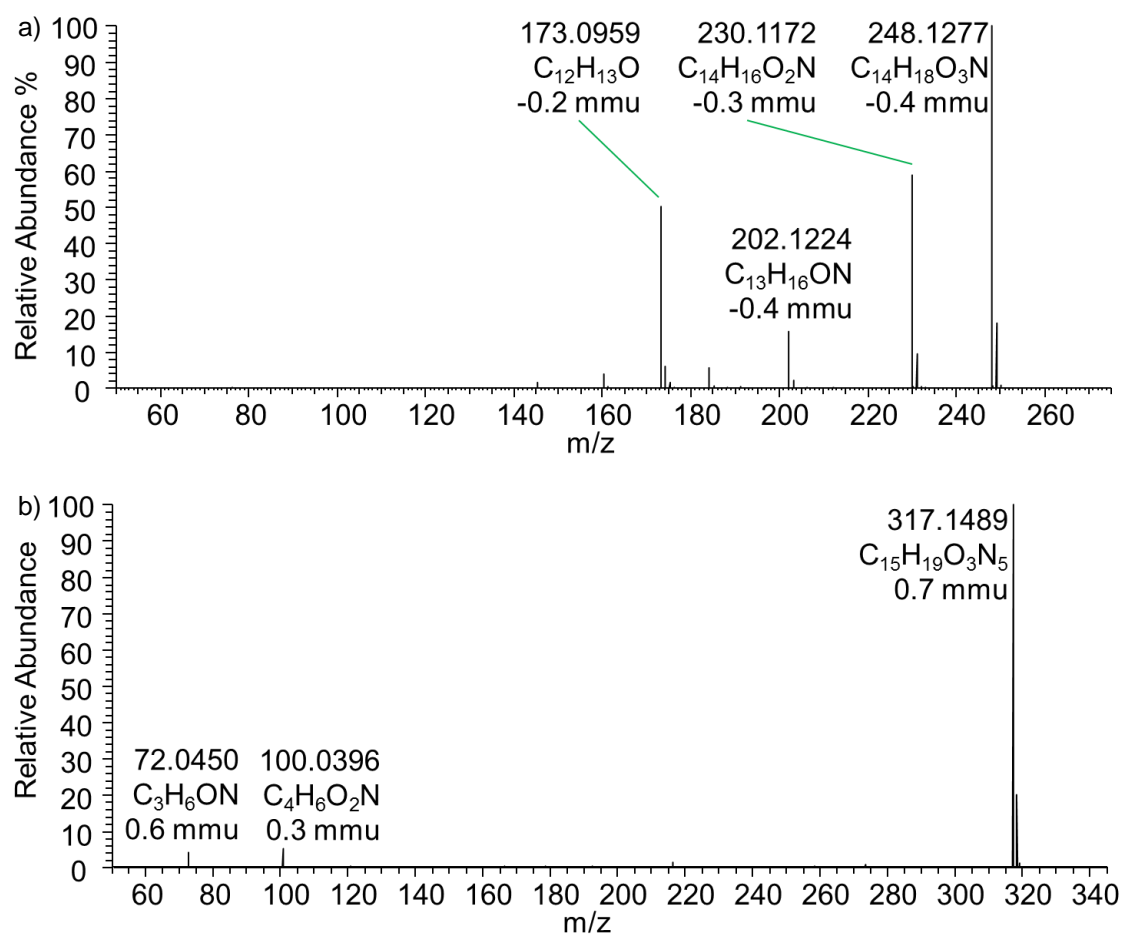

**Figure S26** MS<sup>2</sup> spectrum of product observed in HD/glycine: a)  $m/z$  248.13 (HPLC RT = 6.9 min, UHPLC RT = 1.55 min); b)  $m/z$  317.15 (HPLC RT = 7.1 min, UHPLC RT = 1.57 min).

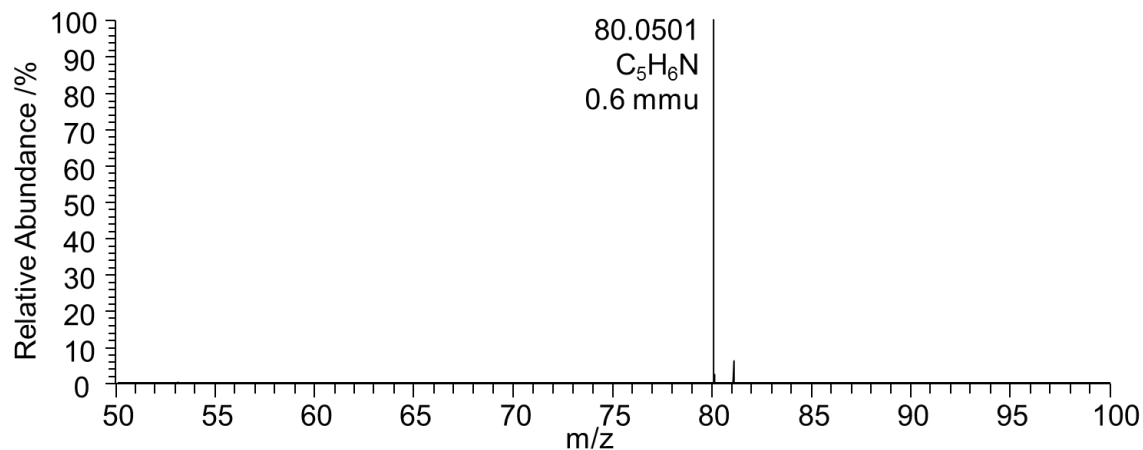

**Figure S27** MS<sup>2</sup> spectrum of product observed in GA/AS: a) *m/z* 80.05 (HPLC RT = 0.9 min, UHPLC RT = 0.36 min).

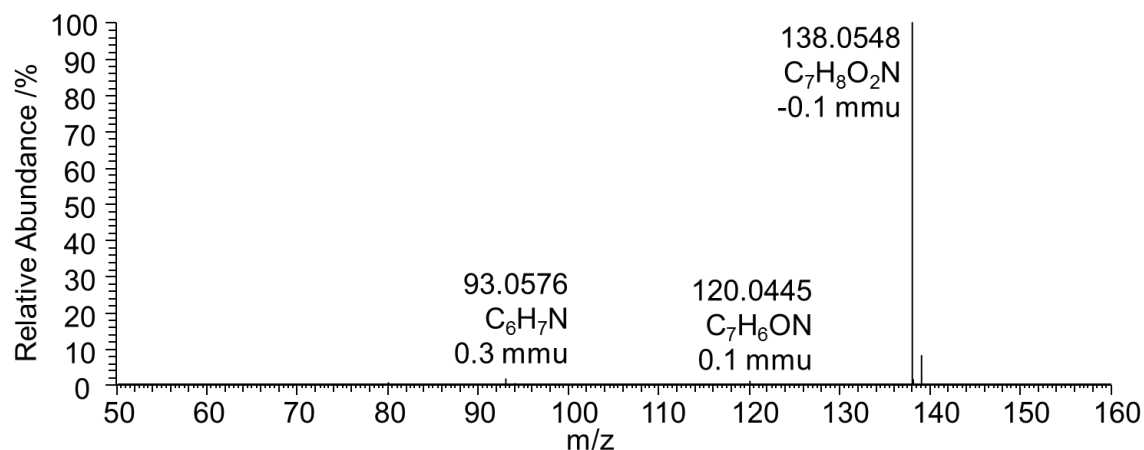

**Figure S28** MS<sup>2</sup> spectrum of product observed in GA/glycine: *m/z* 138.05 (HPLC RT = 1.1 min, UHPLC RT = 0.36 min).

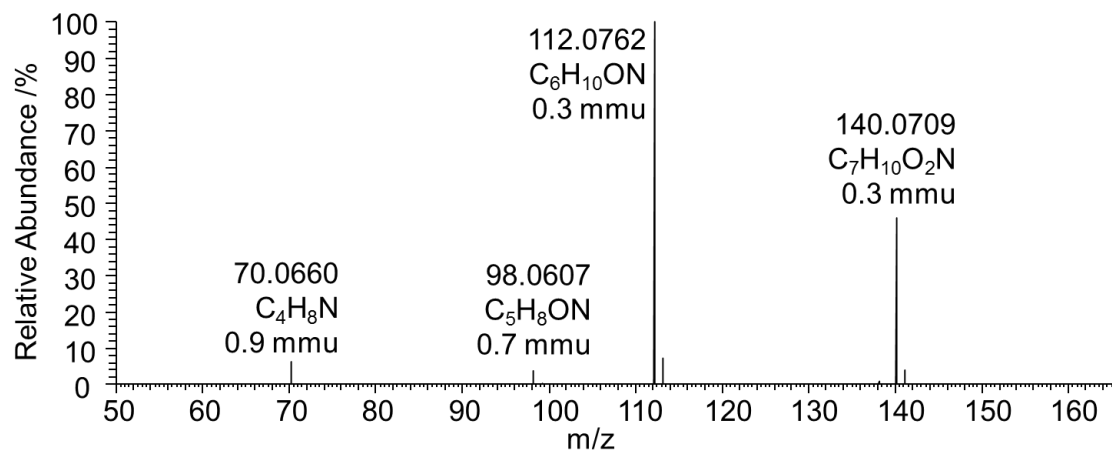

**Figure S29** MS<sup>2</sup> spectrum of product observed in AcAc+Gly/AS: *m/z* 140.07 (HPLC RT = 6.7 min, UHPLC RT = 1.51 min).

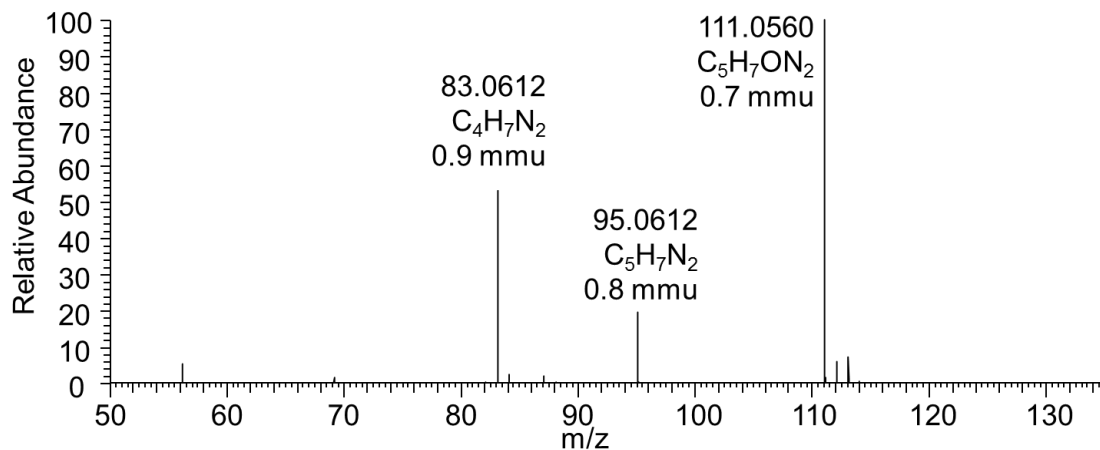

**Figure S30** MS<sup>2</sup> spectrum of product observed in Gly+MGly/AS:  $m/z$  111.06 (HPLC RT = 1.4 min, UHPLC RT = 0.37 min).

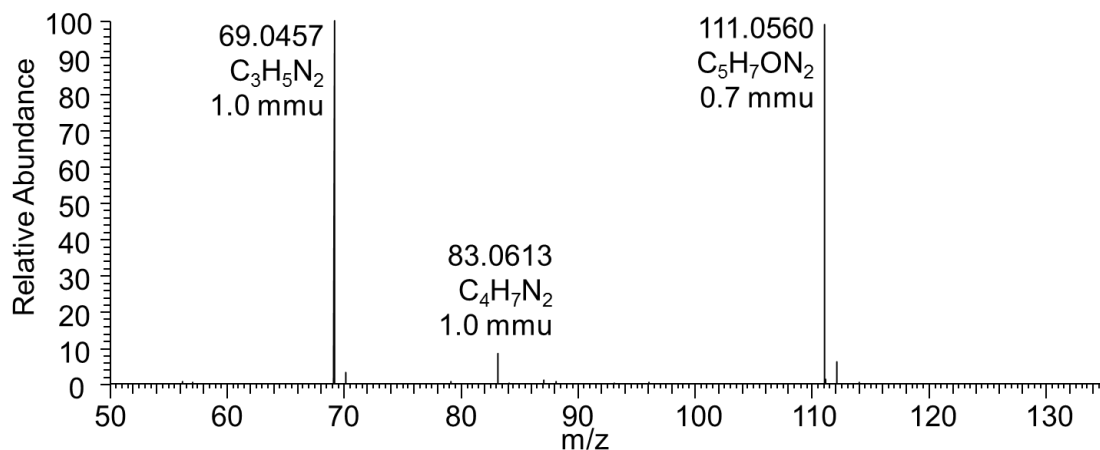

**Figure S31** MS<sup>2</sup> spectrum of product observed in Gly+MGly/AS:  $m/z$  111.06 (HPLC RT = 2.5 min, UHPLC RT = 0.56 min).

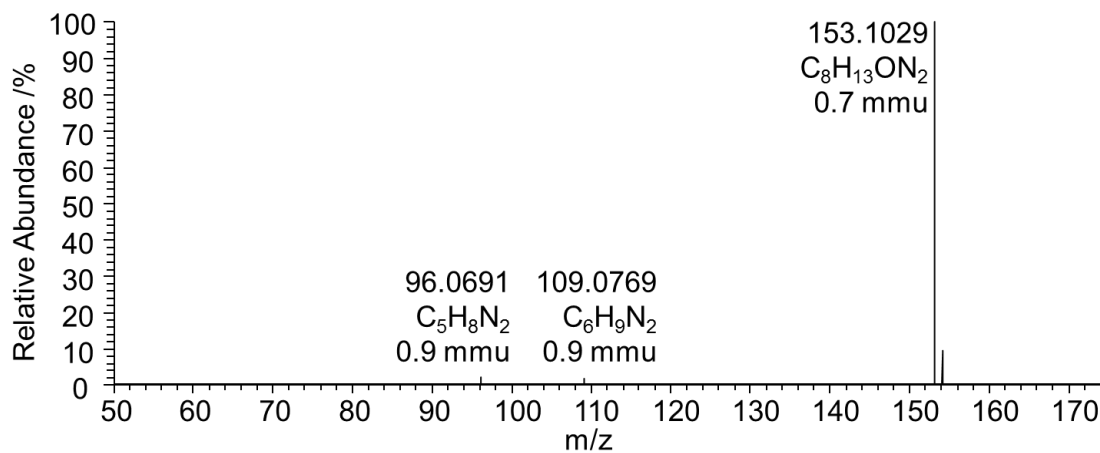

**Figure S32** MS<sup>2</sup> spectrum of product observed in Gly+MGly+GA/AS:  $m/z$  153.10 (HPLC RT = 3.5 min, UHPLC RT = 0.61 min).

#### 4. Reference compound analysis

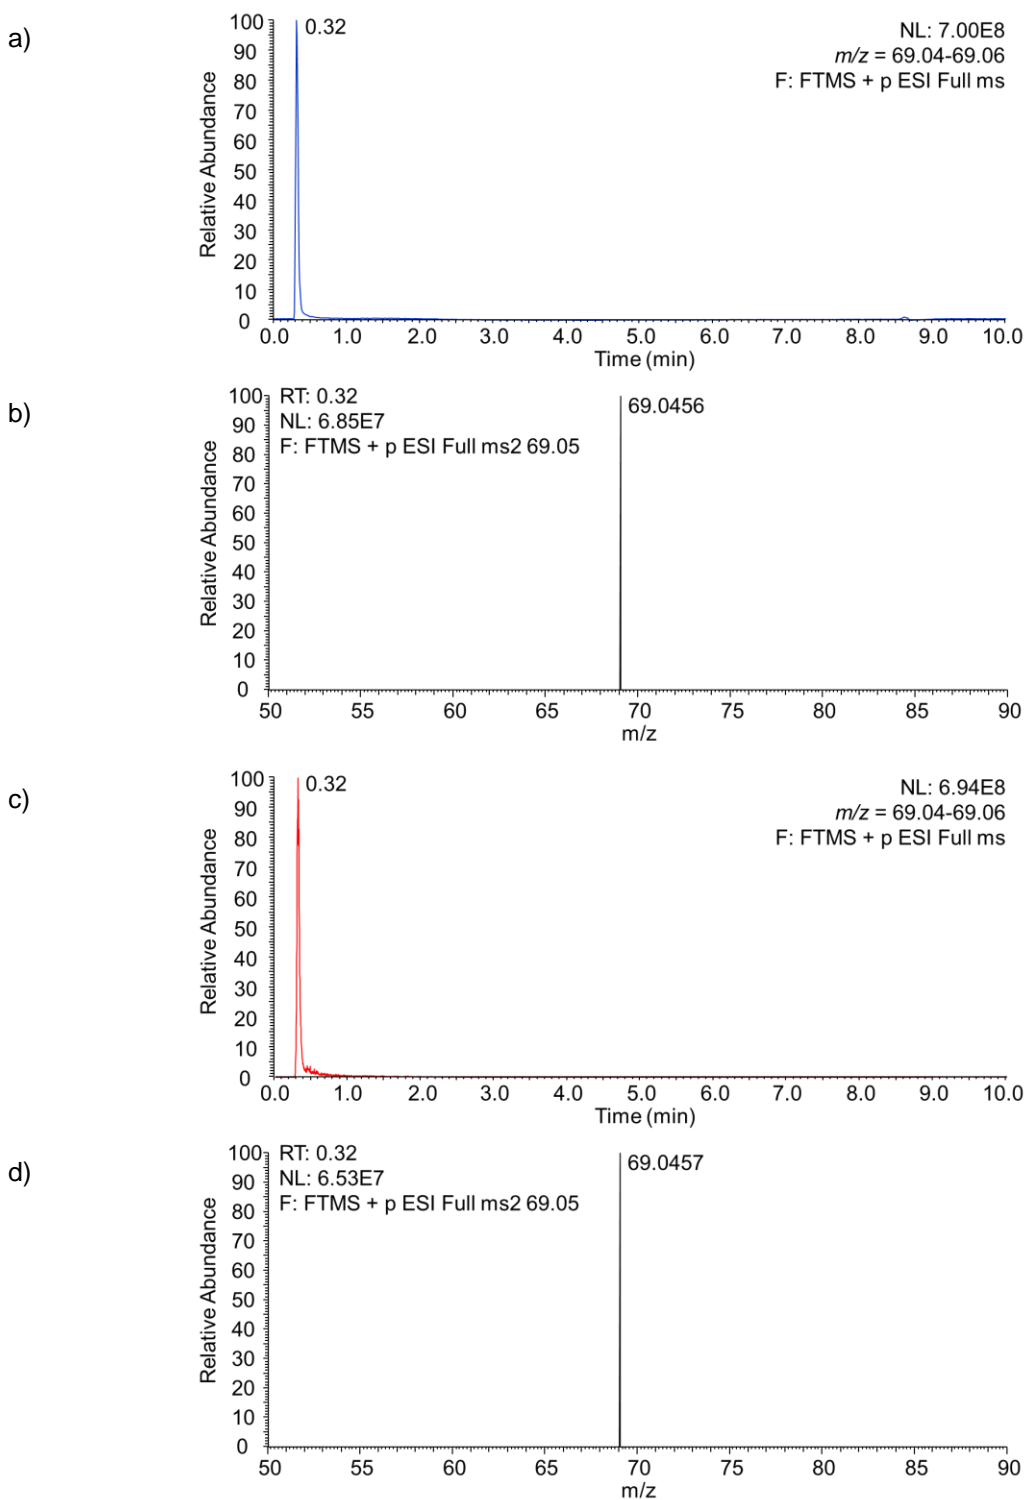

**Figure S33** 1*H*-imidazole (IM): reference compound a) UHPLC-MS EIC  $m/z$  69.04-69.06, b) MS<sup>2</sup> of  $m/z$  69.05; product in Gly/AS c) UHPLC-MS EIC  $m/z$  69.04-69.06, d) MS<sup>2</sup> of  $m/z$  69.05. MS<sup>2</sup> spectra were acquired using 70 NCE fragmentation energy (instrument specific parameter).

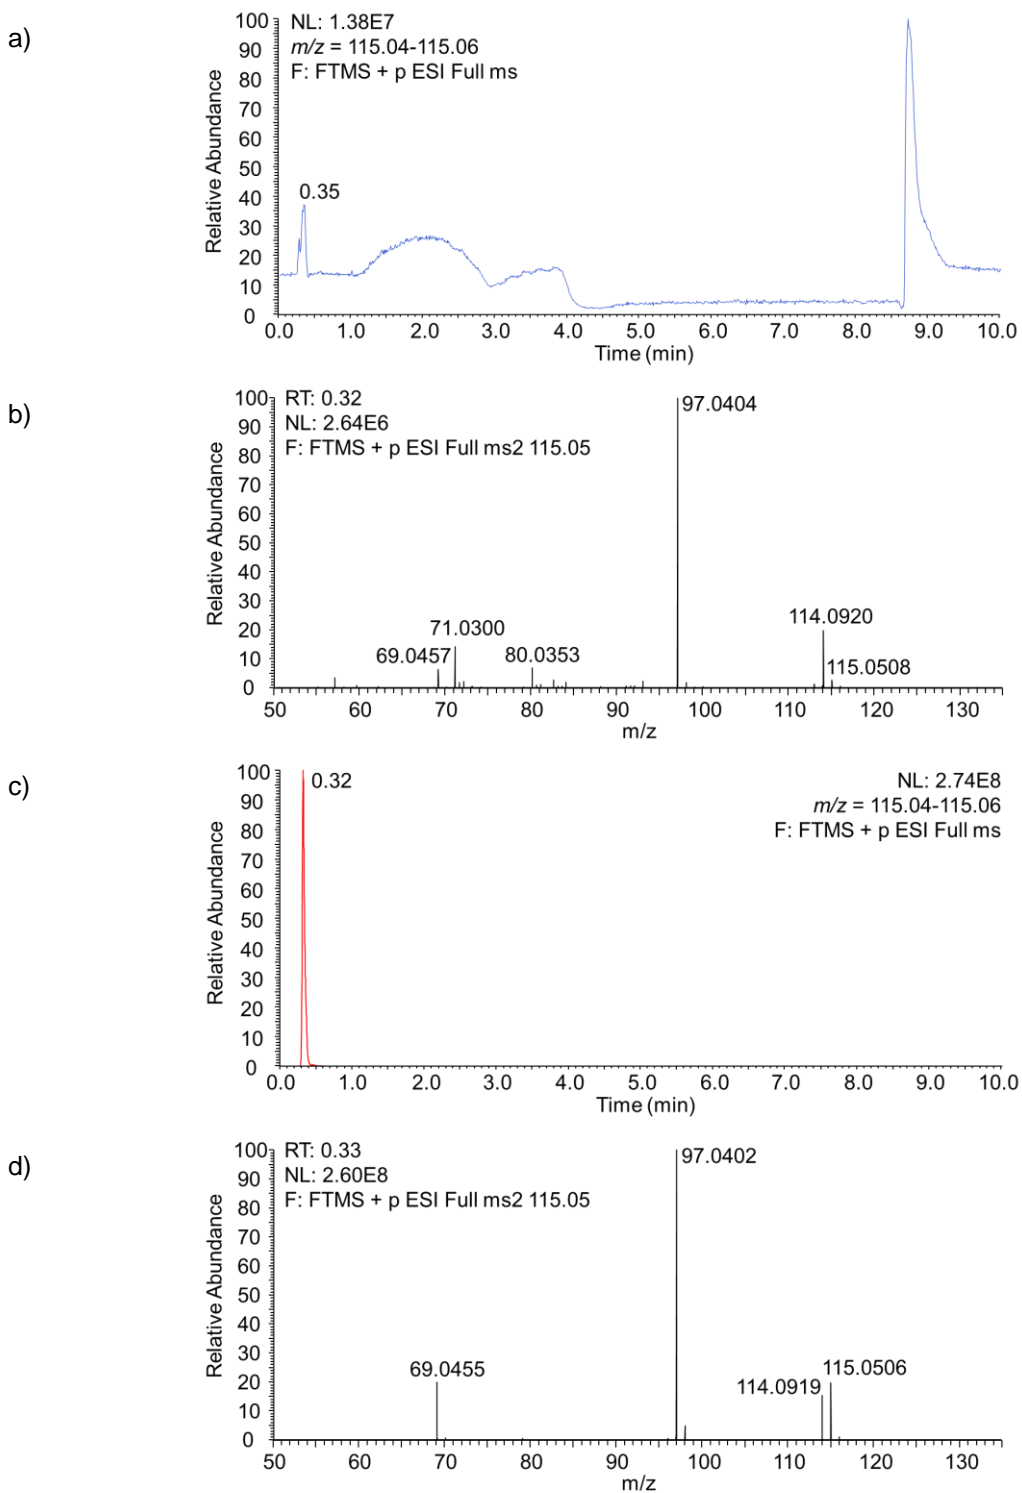

**Figure S34** 1*H*-imidazole-2-carbaldehyde (IC): reference compound a) UHPLC-MS EIC  $m/z$  115.04-115.06, b) MS<sup>2</sup> of  $m/z$  115.05; product in Gly/AS c) UHPLC-MS EIC  $m/z$  115.04-115.06, d) MS<sup>2</sup> of  $m/z$  115.05. MS<sup>2</sup> spectra were acquired using 70 NCE fragmentation energy (instrument specific parameter).

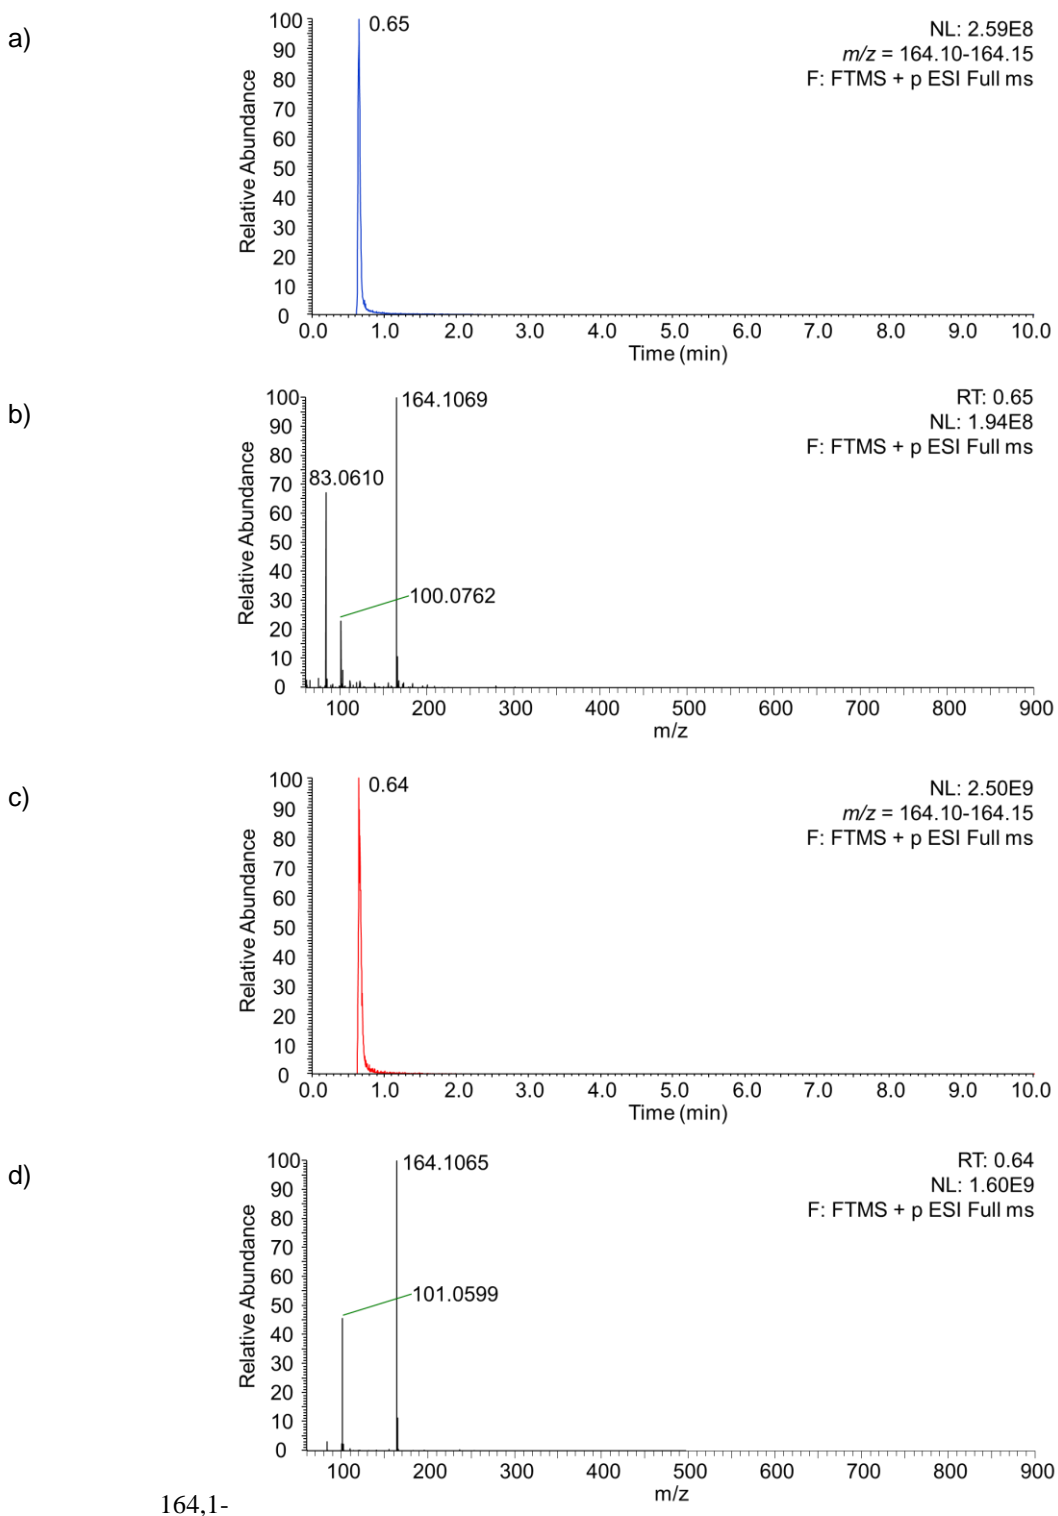

**Figure S35** 3-acetyl-2,4,6-trimethylpyridin (Pyr): reference compound a) UHPLC-MS EIC  $m/z$  164.10-164.15, b) MS 0.65 min RT; product in AcAc/AS c) UHPLC-MS EIC  $m/z$  164.10-164.15, d) MS at 0.64 min RT. No MS<sup>2</sup> spectra of  $m/z$  164.1 were recorded.



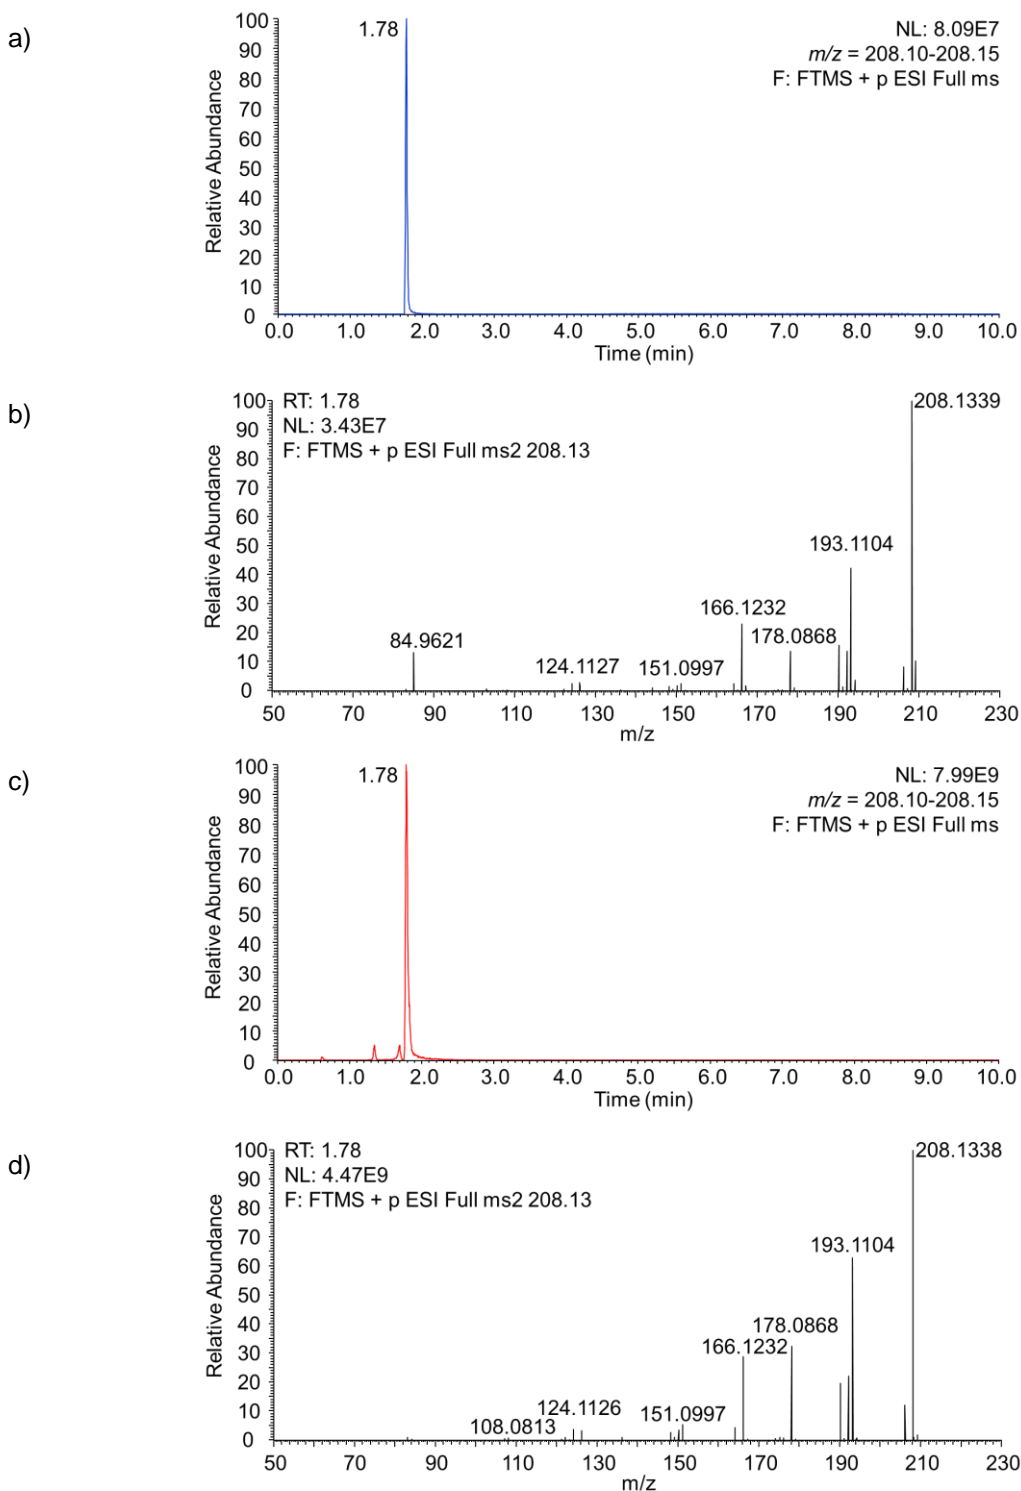

**Figure S36** 3,5-diacetyl-2,4,6-trimethyl-1,4-dihydropyridin (DHP): reference compound a) UHPLC-MS EIC  $m/z$  208.10-208.15, b) MS<sup>2</sup> of  $m/z$  208.13; product in AA+AcAc/AS c) UHPLC-MS EIC  $m/z$  208.10-208.15, d) MS<sup>2</sup> of  $m/z$  208.13. MS<sup>2</sup> spectra were acquired using 70 NCE fragmentation energy (instrument specific parameter).
